# Supplementary material
Source: PubMed Central journal article supplement (PMC6176908)
Supplement: NIHMS79782-supplement-Supplementary_data.pdf [file NIHMS79782-supplement-Supplementary_data.pdf]

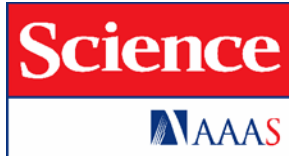

## Supplementary Materials for

### **Rearrangement bursts generate canonical gene fusions in bone and soft tissue tumors**

Nathaniel D. Anderson, Richard de Borja\*, Matthew D. Young\*, Fabio Fuligni\*, Andrej Rosic, Nicola D. Roberts, Simon Hajjar, Mehdi Layeghifard, Ana Novokmet, Paul E. Kowalski, Matthew Anaka, Scott Davidson, Mehdi Zarrei, Badr Id Said, L. Christine Schreiner, Remi Marchand, Joseph Sitter, Nalan Gokgoz, Ledia Brunga, Garrett T. Graham, Anthony Fullam, Nischalan Pillay, Jeffrey A. Toretsky, Akihiko Yoshida, Tatsuhiro Shibata, Markus Metzler, Gino R. Somers, Stephen W. Scherer, Adrienne M. Flanagan, Peter J. Campbell, Joshua D. Schiffman, Mary Shago, Ludmil B. Alexandrov, Jay S. Wunder, Irene L. Andrulis, David Malkin†, Sam Behjati†, Adam Shlien†

\*These authors contributed equally to this work.

†Corresponding author. Email: adam.shlien@sickkids.ca (A.S.); sb31@sanger.ac.uk (S.B.); david.malkin@sickkids.ca (D.M.)

Published 31 August 2018, *Science* **361**, eaam8419 (2018)  
DOI: 10.1126/science.aam8419

#### **This PDF file includes:**

Figs. S1 to S20  
Tables S1 to S5  
References

**A**

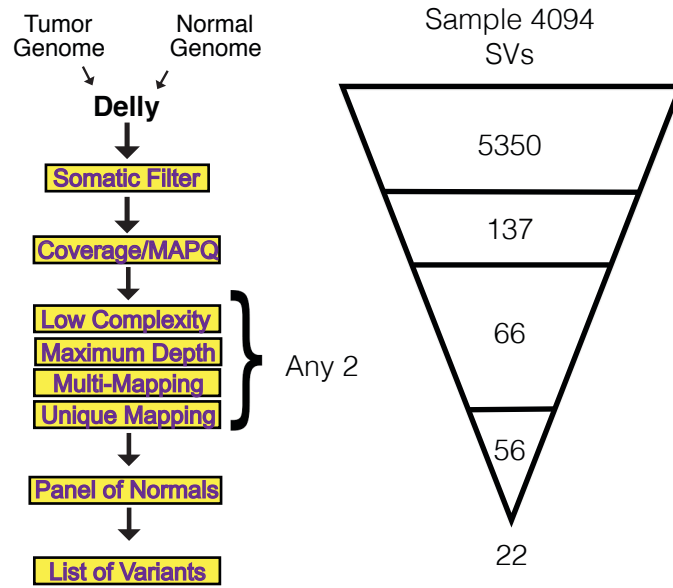

**B**

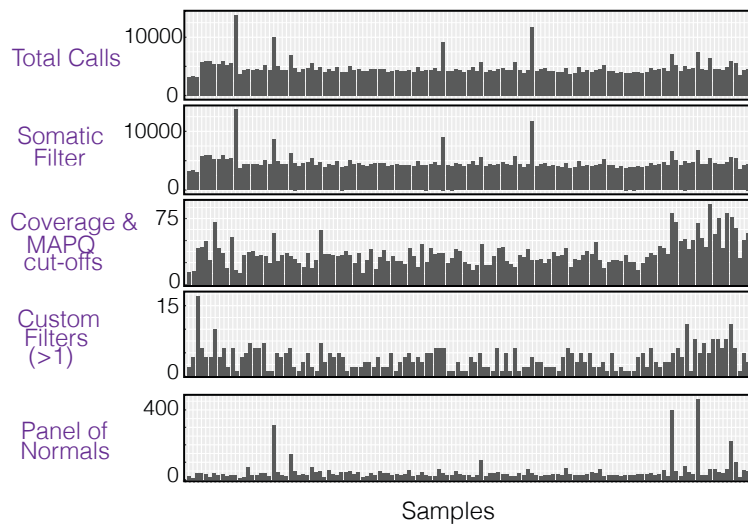

**C**

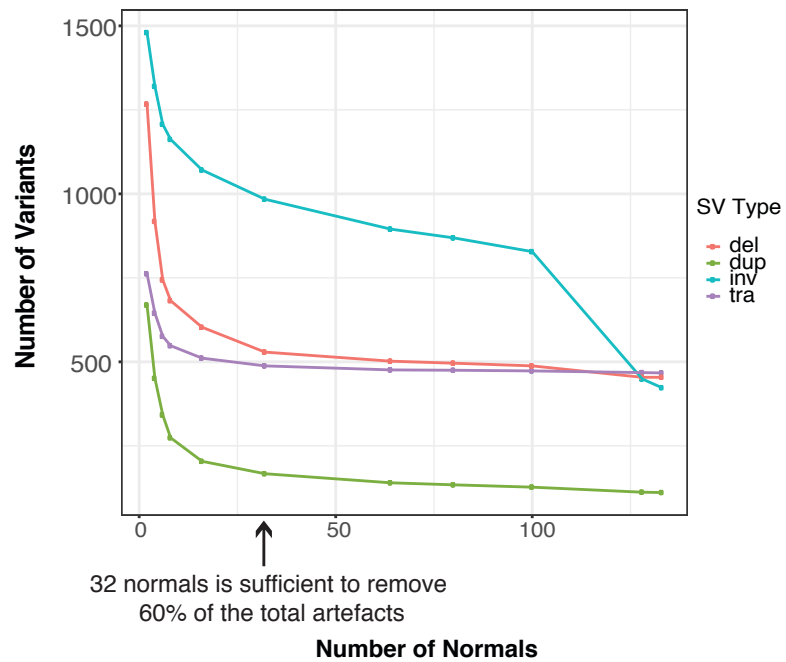

**Fig. S1. Informatics pipelines to detect somatic substitutions and rearrangements.** (A) Rearrangement pipeline overview schematic illustrates the use of the detection tool, Delly, and the custom filters applied to its raw output. A representative sample is illustrated showing the number of variants retained after each filtering step. (B) First panel shows number of rearrangements in raw output. Subsequent panels show number of variants removed after each step. (C) Power of panel-of-normals: dose-response curves for rearrangements. With an increase in the number of normal samples used in your panel, the power to remove artefacts increases.

**A****Toronto Cohort**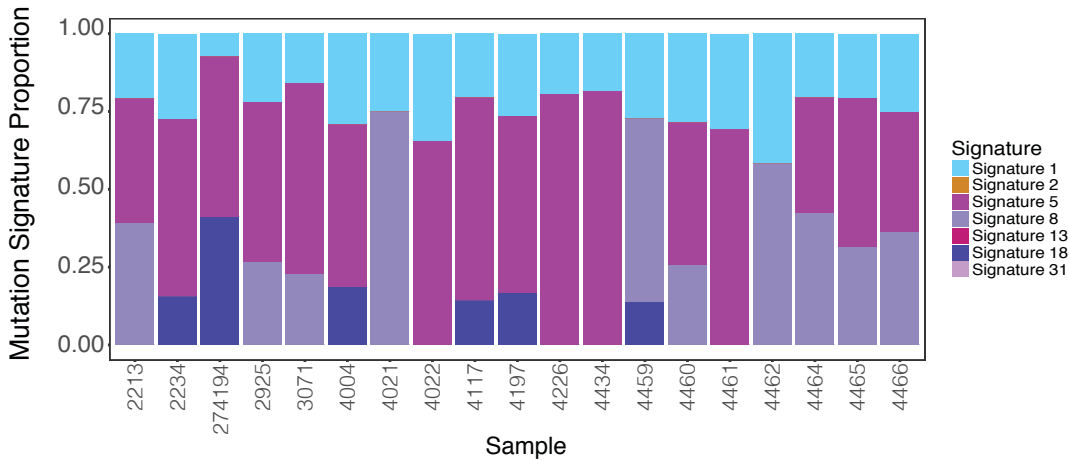**Validation Cohort**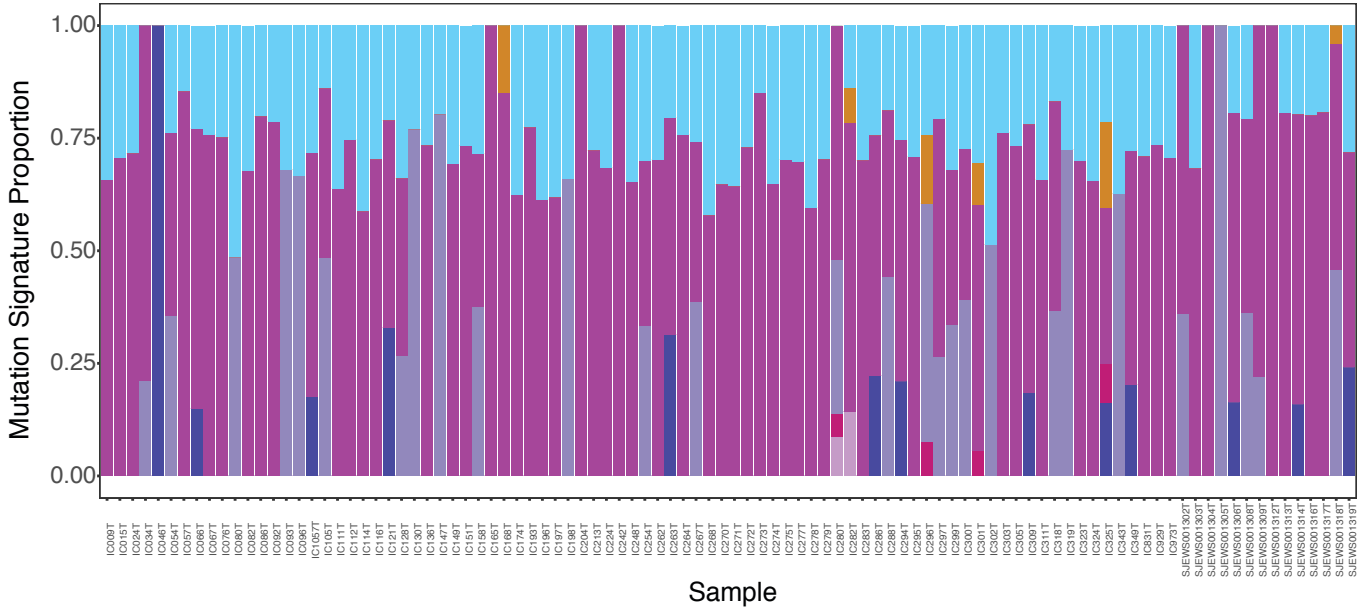**B**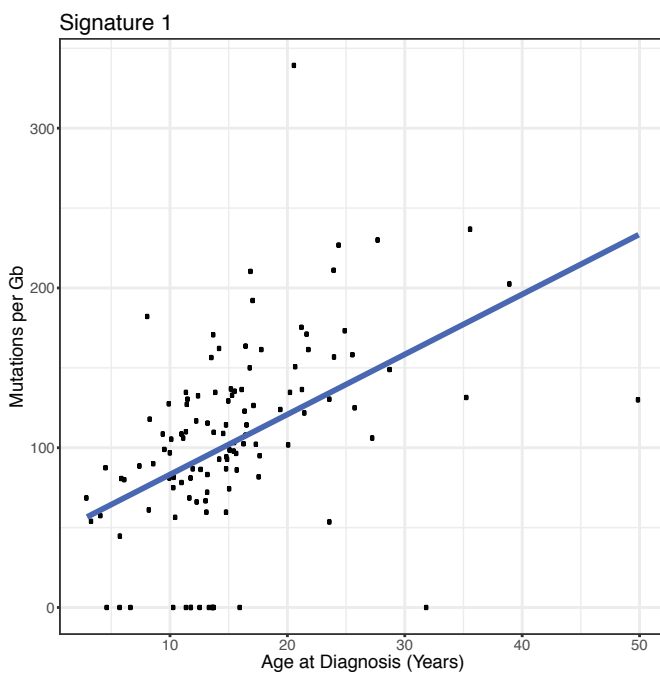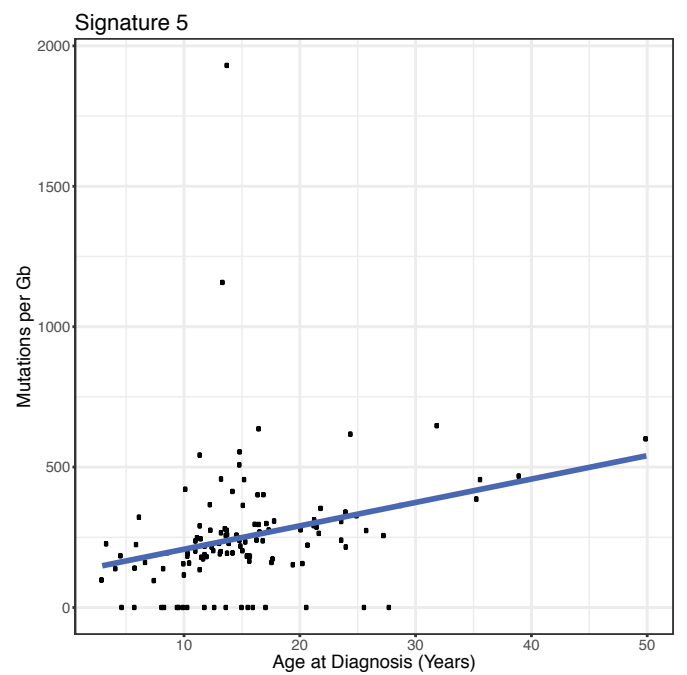



**Fig S2. Mutation Signatures in Ewing sarcoma.** (A) Stacked bar charts illustrate the sample-by-sample breakdown of the proportion of mutation signatures in each tumor for the Toronto and Validation cohort. Signatures for diagnostic tumors with a matched relapsed or metastatic tumor (n=4) can be seen in Fig 5A. COSMIC Signatures 1 and 5 are the most common (purple and sky blue). (B) Clock-like mutation signatures (COSMIC 1 and 5) have been found to be associated with the age of diagnosis in other cancers. Scatter plot illustrates positive correlation between mutation burden and age at diagnosis in ES patients for COSMIC signatures 1 and 5.

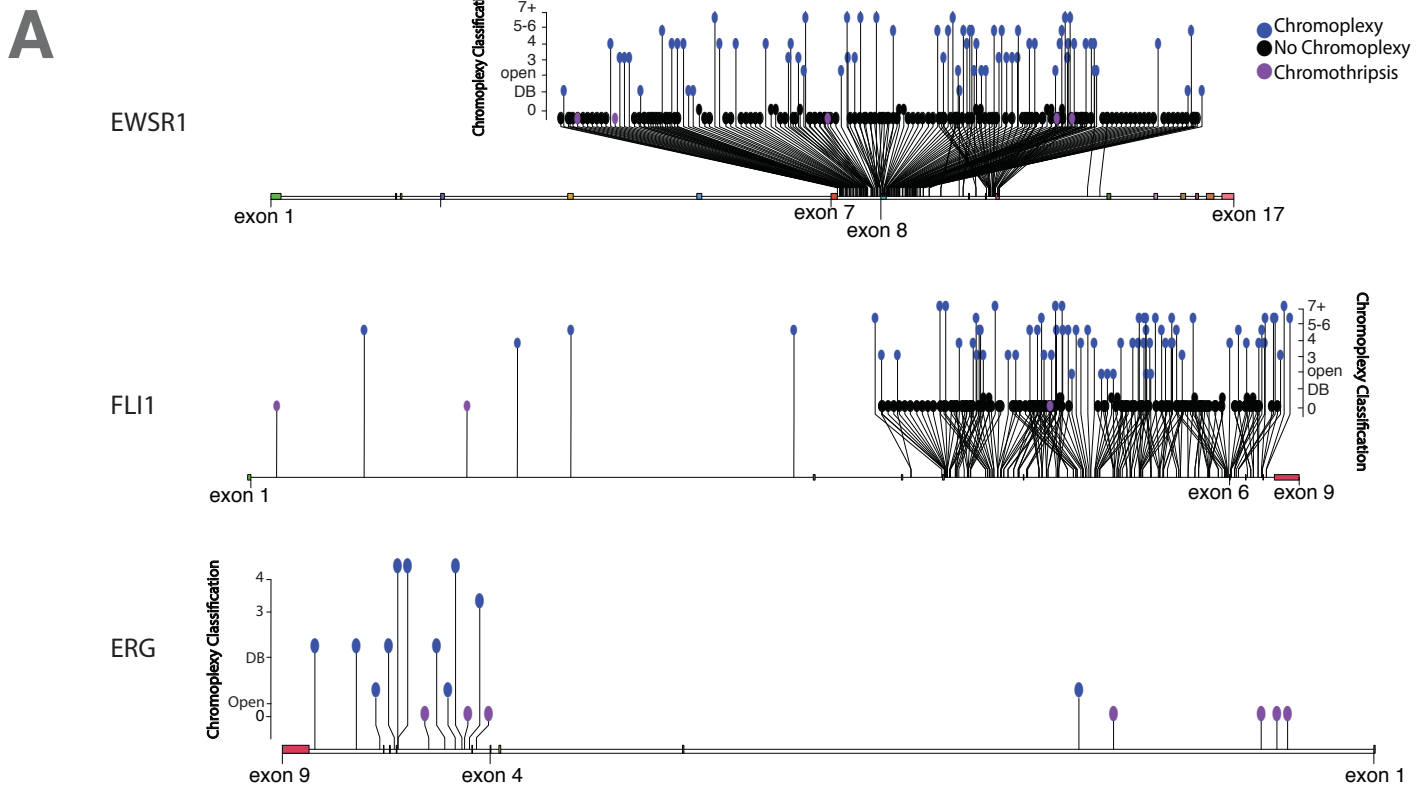

**B**

|                             | FLI1   | ERG    |
|-----------------------------|--------|--------|
| Age at Diagnosis (months)   | 199.67 | 155.52 |
| Sex (M:F)                   | 19:16  | 7:4    |
| Proportion of Genic Hits    | 56.20% | 57.88% |
| Average # of Rearrangements | 13     | 18     |

**C**

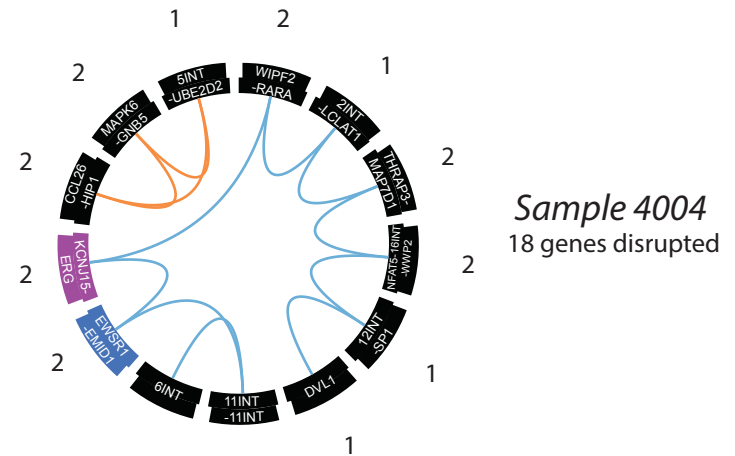

**D**

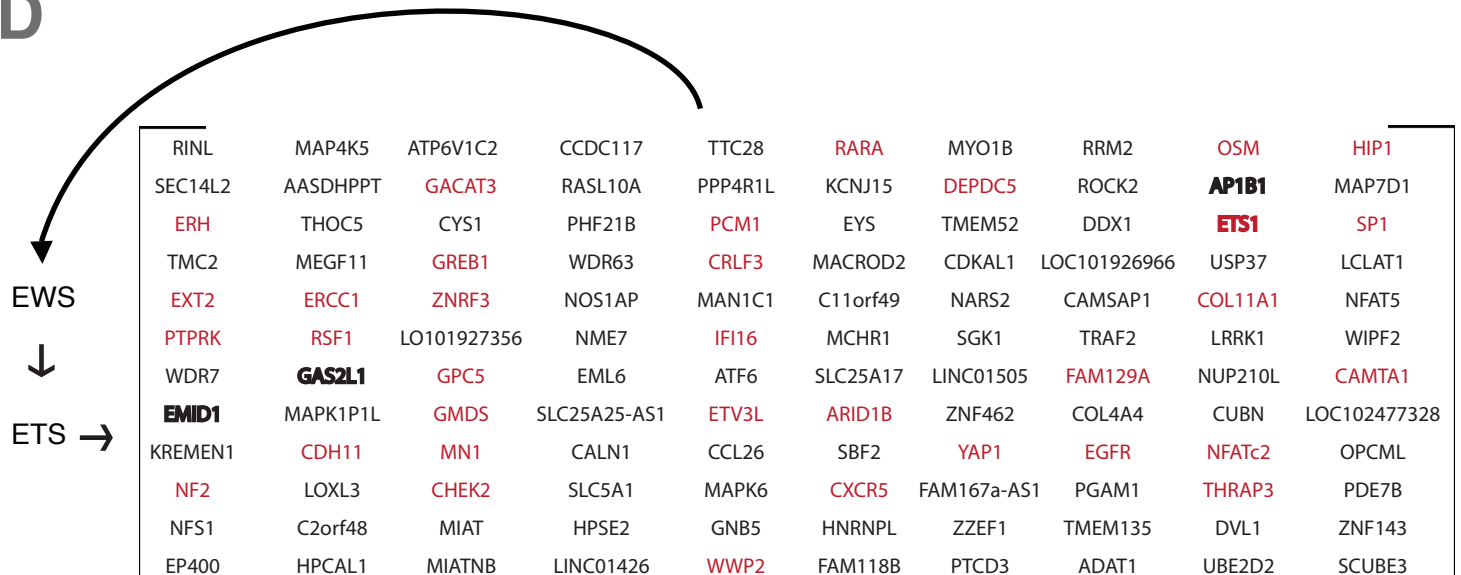

**Fig. S3. Characterizing chromoplectic breakpoints in**

**Ewing sarcoma. (A)** Breakpoint distribution for the *EWSR1*, *FLII* and *ERG* genes are shown. We observed no difference in intronic breaks for chromoplectic and non-chromoplectic *EWSR1* breaks. Non-canonical *FLII* breaks (before exon 3) are exclusively chromoplectic. All *ERG*-rearranged Ewing sarcoma tumors exhibited patterns of chromoplexy. The color and height of lollipop balls refer to complex rearrangements and their classification (i.e. number of rearrangements in a loop, open loops or the existence of deletion bridges (DB)). **(B)** Table overview comparing chromoplexy in EWS-FLI1 and EWS-ERG driven tumors. **(C)** Circos web illustrating the Ewing sarcoma sample with 2 looped rearrangement clusters affecting 18 genes (n=18). **(D)** Flow diagram of all the unique genes (n=120) affected by chromoplexy in Ewing sarcoma. Established cancer-associated genes are highlighted (red) and recurrently affected genes are bolded.

# A Spectral Karyotyping

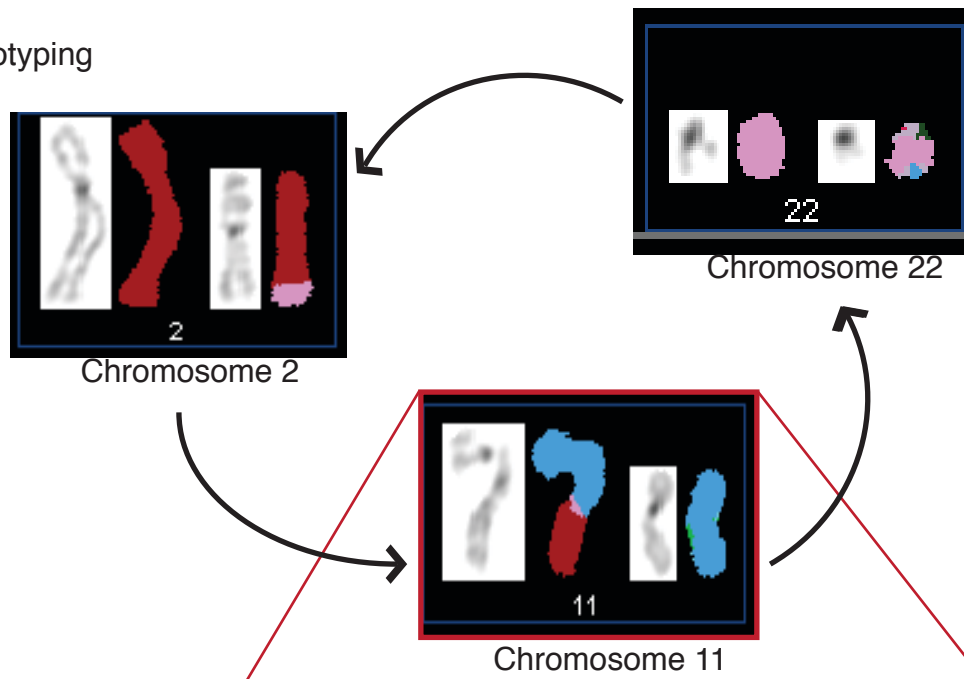

# B

## Custom-Capture Sequencing

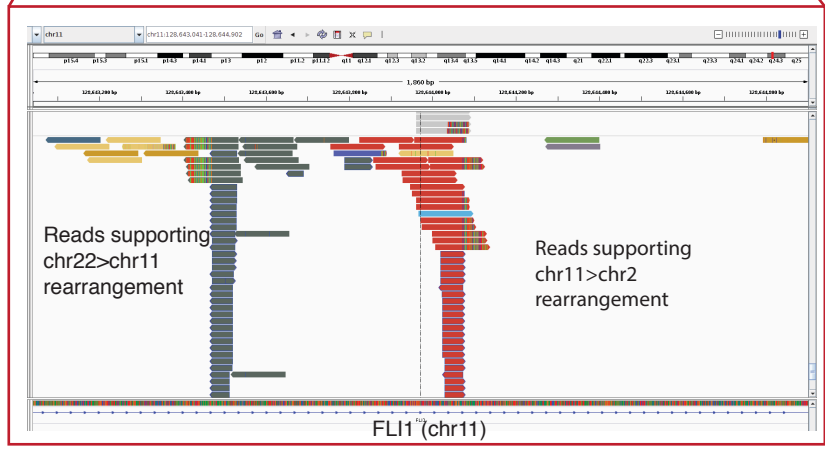

# C

| Sample        | Nextera | Matched Genome | Chromoplexy | Fusion   | Other Rearrangements                 |
|---------------|---------|----------------|-------------|----------|--------------------------------------|
| 2213          | Yes     | Yes            | Yes         | EWS-FLI1 | EWS-SCUBE3, SCUBE3-FLI1              |
| 2226          | Yes     | Yes            | Yes         | EWS-FLI1 | FLI1-CXCR5                           |
| 2234          | Yes     | Yes            | Yes         | EWS-FLI1 | EWSR1-chr8, FLI1-chr6, chr6 deletion |
| 2925          | Yes     | Yes            | Yes         | EWS-FLI1 | EWS-chr5, chr5-FLI1, FLI1-chr11      |
| 4117          | Yes     | Yes            | Yes         | EWS-FLI1 | EWS-chr7, FLI1-CUBN                  |
| 4311          | Yes     | Yes            | Yes         | EWS-FLI1 | EWS-UNC5D, UNC5D-FLI1                |
| PD9684 (3071) | Yes     | Yes            | Yes         | EWS-ERG  | EWS-CAMTA1                           |
| PD9668 (2498) | Yes     | No             | No          | EWS-FLI1 | NA                                   |
| PD9675 (2301) | Yes     | No             | Yes         | EWS-FLI1 | EWS-NCOR2, FLI1-NCOR2                |
| PD9679 (2331) | Yes     | No             | No          | EWS-FLI1 | NA                                   |
| PD9681 (2134) | Yes     | No             | Yes         | EWS-FLI1 | chr22-FLI1                           |
| PD9682 (2187) | Yes     | No             | Yes         | EWS-FLI1 | EWS-chr2, FLI1-chr2                  |
| PD9691 (3935) | Yes     | No             | Yes         | EWS-ERG  | EWS-GRAMD4                           |
| PD9692 (3938) | Yes     | No             | No          | EWS-FLI1 | NA                                   |

**Fig. S4. Validating chromoplexy using cytogenetics and targeted sequencing.** (A) Spectral Karyotyping (SKY, multi-colored fluorescent *in situ* hybridization) identifies 24 human chromosomes in a single hybridization and stains each one for a different color. Derivative chromosomes for a three-way rearrangement between chromosomes 22, 11 and 2 are depicted. (B) Visual flow diagram of a three-way rearrangement between chromosomes 22, 11 and 2 is shown on the left. Nextera custom capture sequencing was applied to this (and many other) samples to confirm complex rearrangements detected by whole-genome sequencing. We achieved coverage of target regions between 900-1000X. An IGV (integrated genomics viewer) screenshot of FLI1 shows reads translocated to chromosome 22 (green) and chromosome 2 (orange) (right). (C) Validation table provides an overview of all samples that have undergone Nextera custom capture sequencing and other platforms that have also performed on these samples. Many rearrangements not included on this panel were also detected, proving chromoplexy occurs in *cis* (on the same strand, otherwise they would not be sequenced).

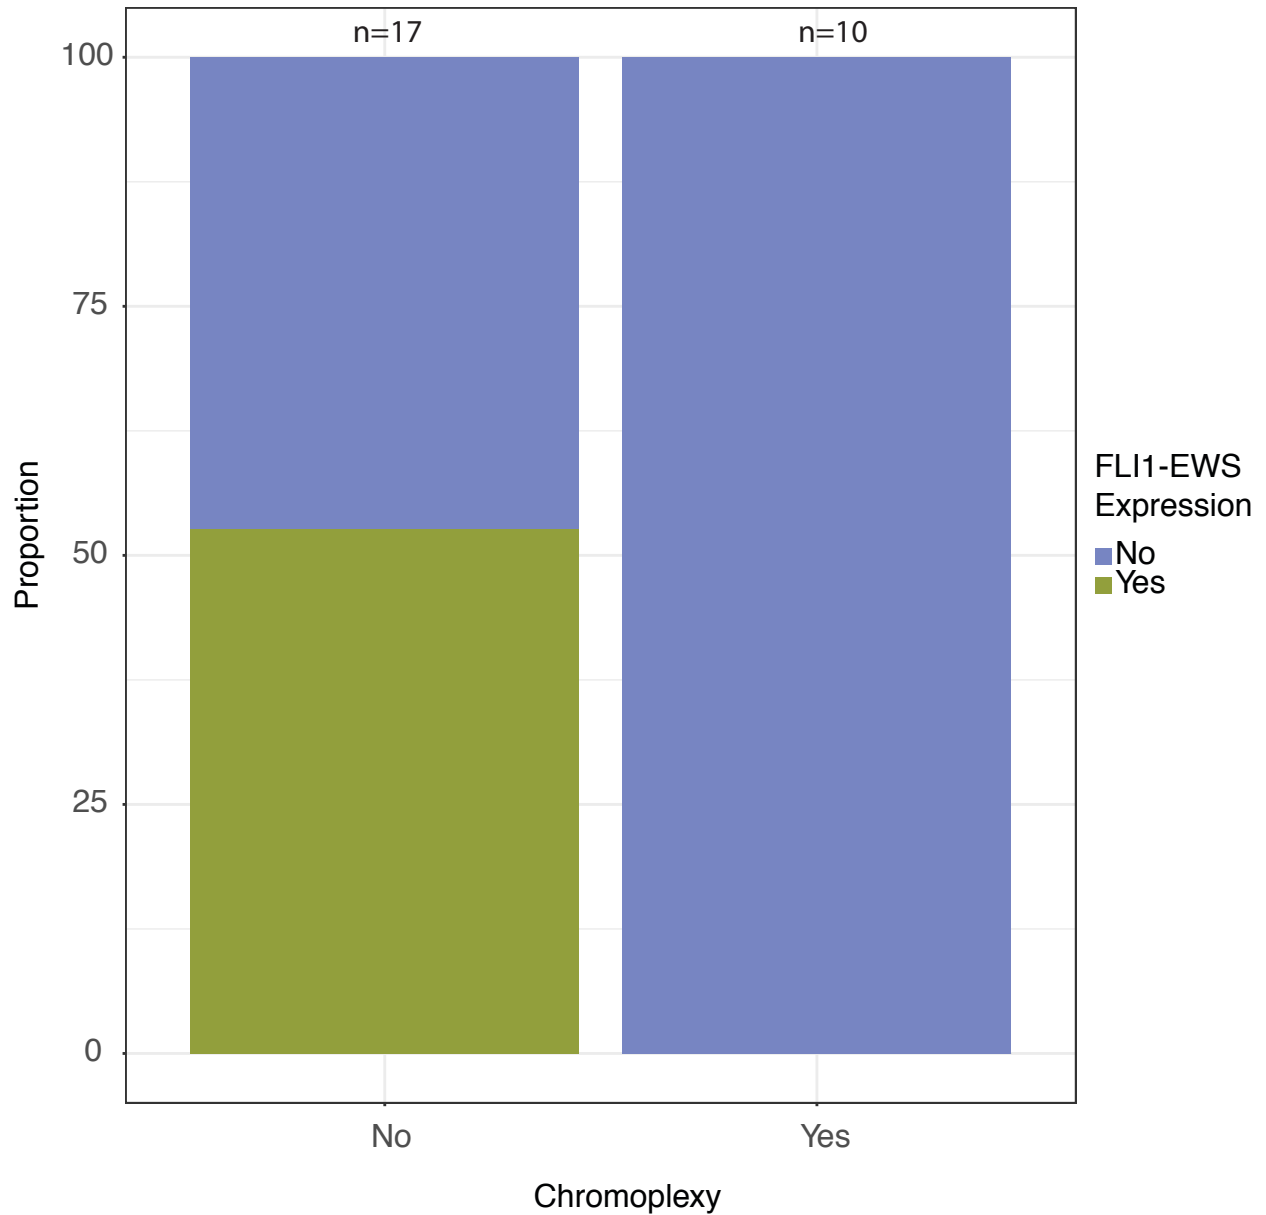

**Fig. S5. *FLI1-EWSR1* expression in Ewing sarcoma primary tumors from RNA-seq.** In the genome, the presence of chromoplexy and the reciprocal fusion were mutually exclusive. As shown here, in the transcriptome, when chromoplexy occurs, the *FLI1-EWSR1* reciprocal fusion is not expressed. Conversely, when chromoplexy does not occur, the *FLI1-EWSR1* fusion is expressed 52% of the time.

**A****Toronto Cohort****Validation Cohort**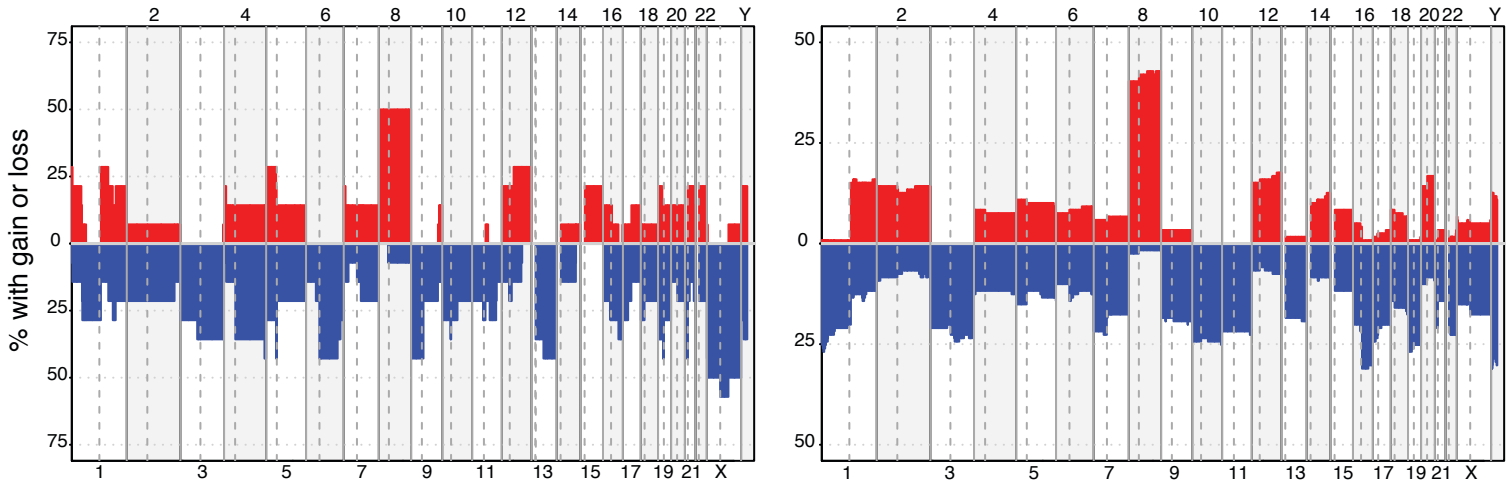**B**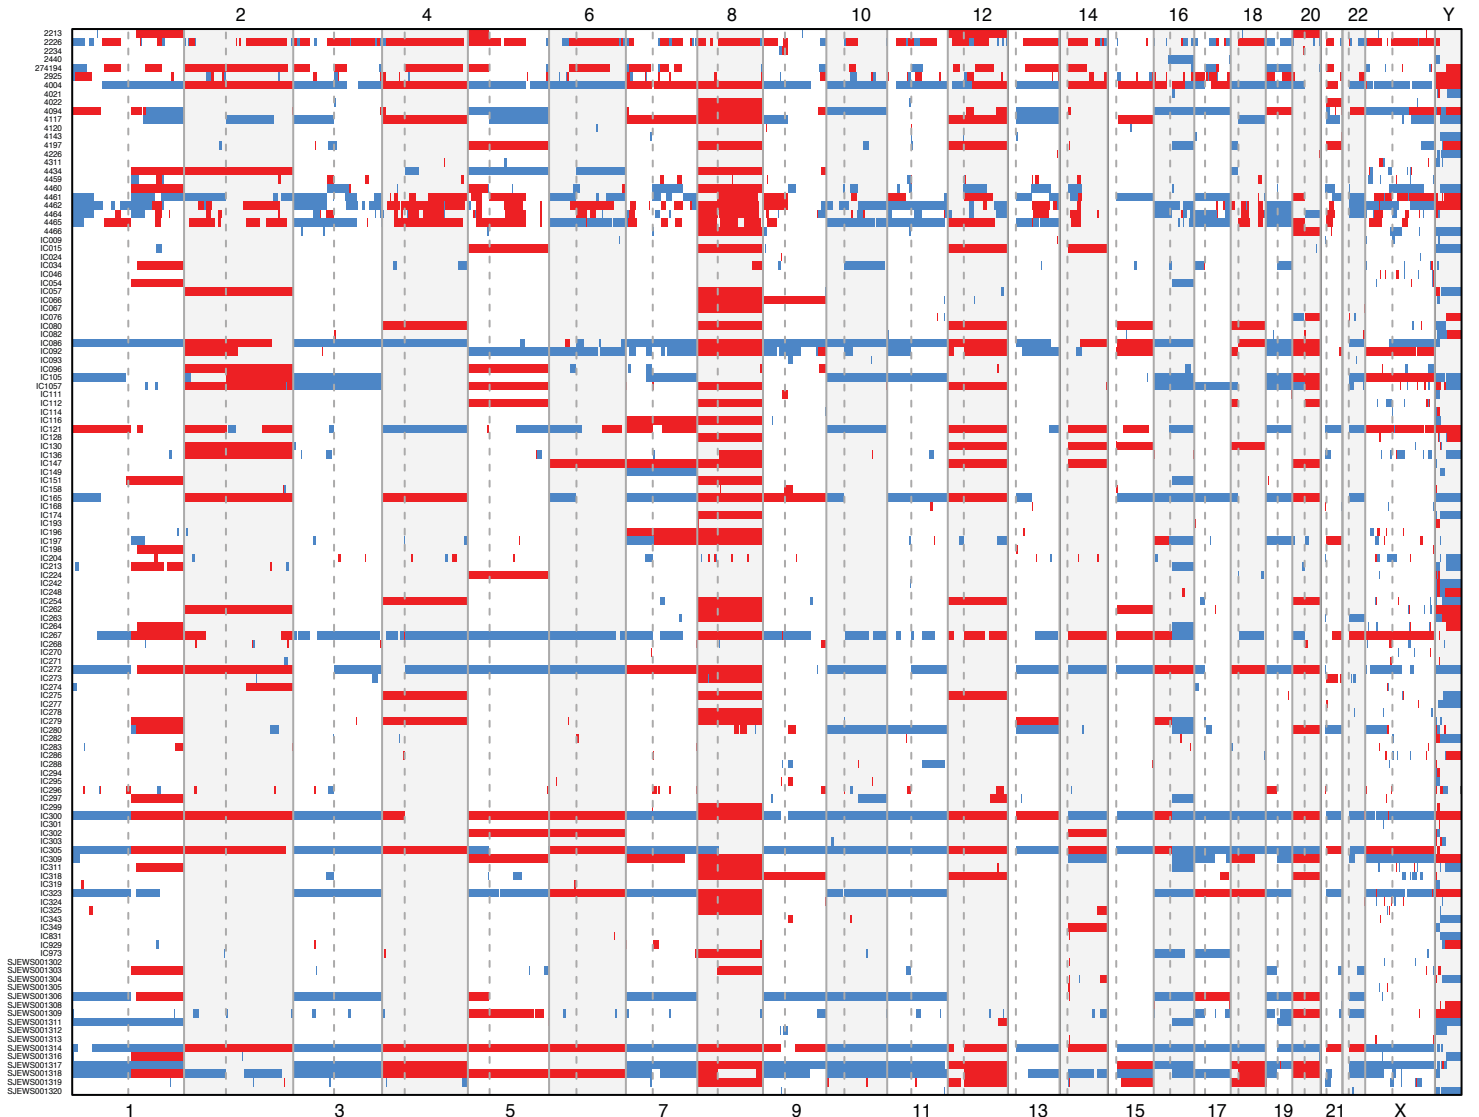

**Figure S6. Global Copy-number alterations in ES.** (A) Copy-number profiles for Toronto (left) and Tirode, Surdez *et al.* (right) demonstrate common copy number alterations in both cohorts. (B) Copy-number heatmap provides sample-by-sample breakdown of arm-length and focal copy-number alterations (CNAs) in Ewing sarcoma (ES) using a low threshold cut-off ( $\pm 0.2$ ). For a full catalogue of CNAs in ES, see Tirode et al 2014 *Cancer Discovery*.



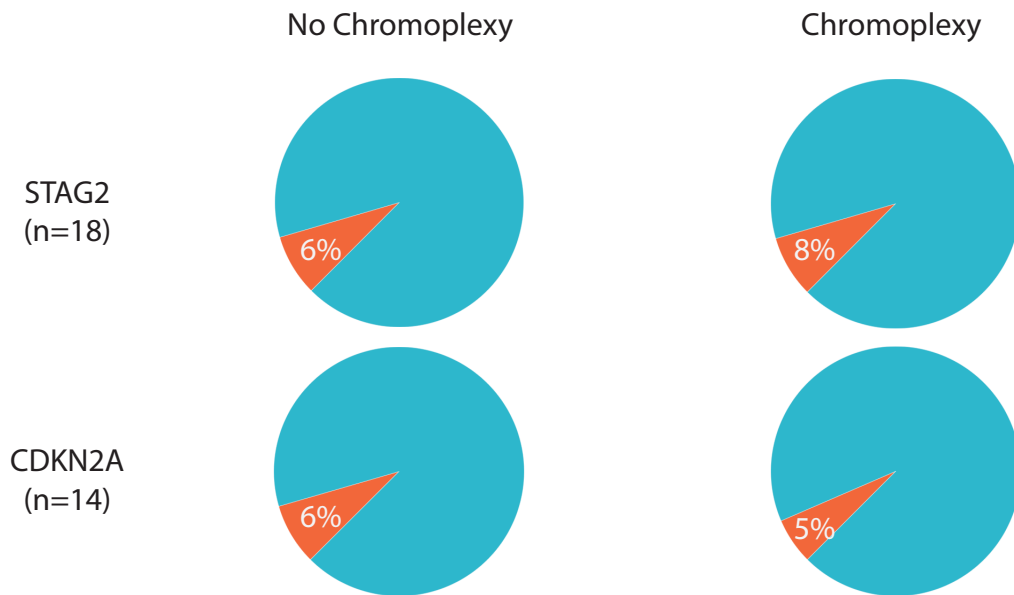

**Fig. S7. Distribution of *STAG2* and *CDKN2A* mutations between simple and chromoplexy ES.** Pie charts illustrate no difference in the prevalence of somatic *STAG2* mutations or *CDKN2A* deletions in Ewing sarcomas with and without chromoplexy.

# Genomic Complexity

# Canonical Fusion

**A**

Chondromyxoid fibroma 2

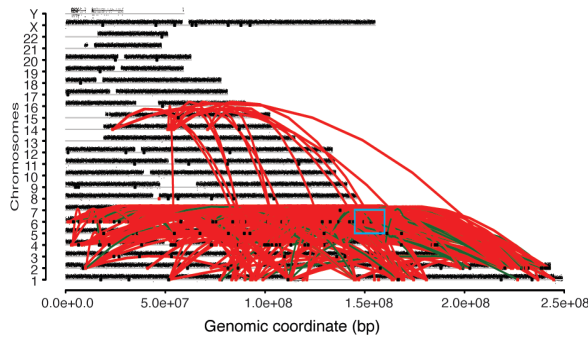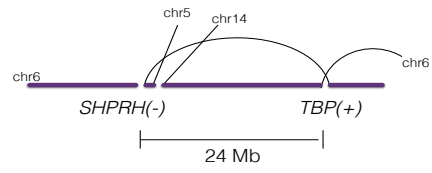

|                       |  |                                        |
|-----------------------|--|----------------------------------------|
| Genomic Breakpoint(s) |  | <i>TBP-SHPRH</i><br><i>FRMD6-SHPRH</i> |
| RNA Fusions           |  | <i>FRMD6-GRM1?</i>                     |

**B**

Chondromyxoid fibroma 3

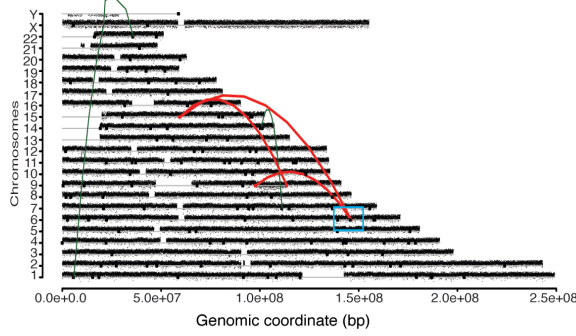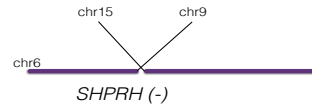

|                       |  |                                           |
|-----------------------|--|-------------------------------------------|
| Genomic Breakpoint(s) |  | <i>MYO1E-SHPRH</i><br><i>C9orf3-SHPRH</i> |
| RNA Fusions           |  | <i>MYO1E-GRM1?</i>                        |

**C**

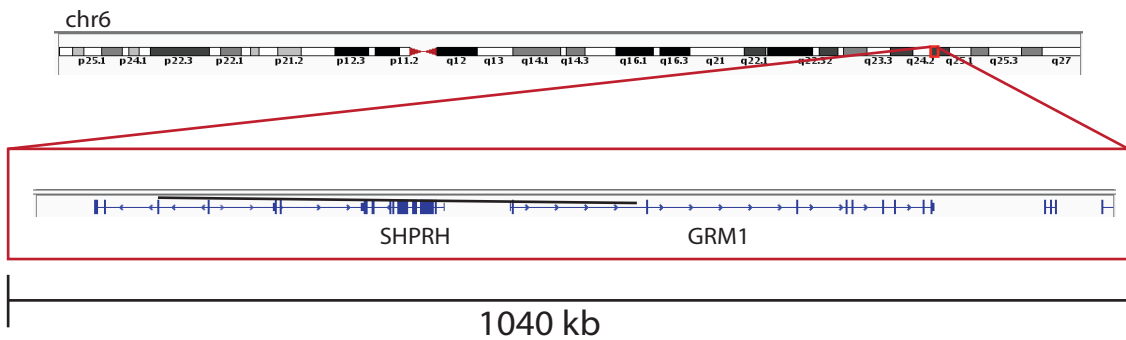

**D**

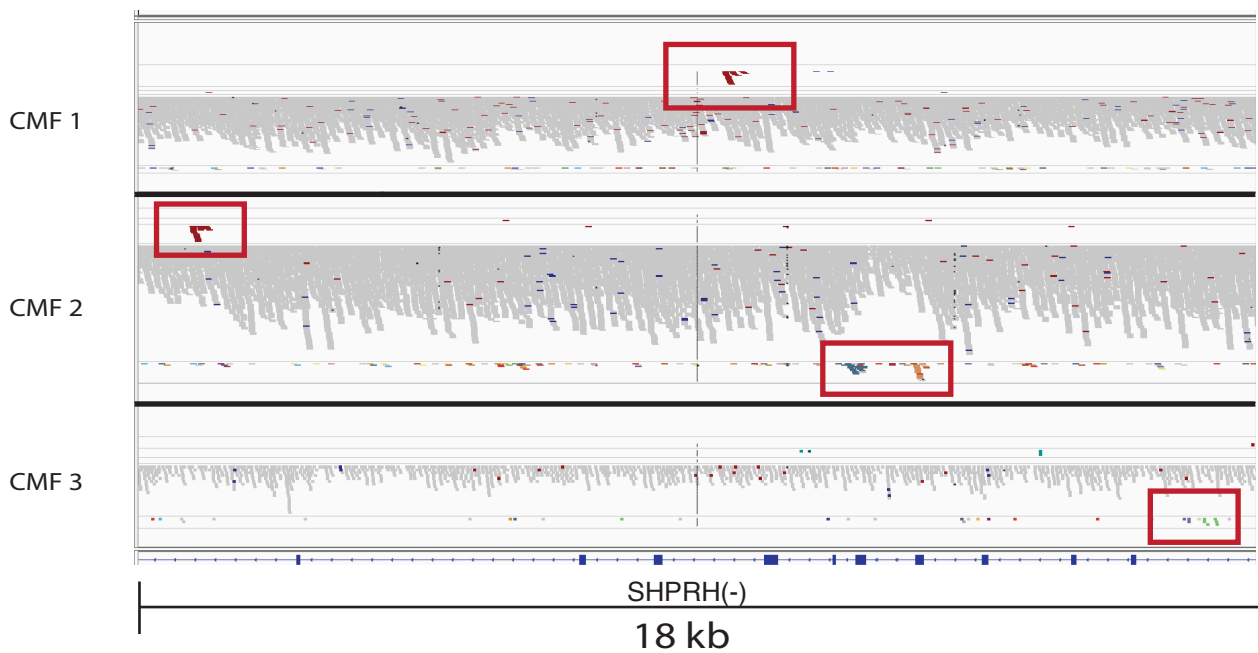

**Fig. S8. Genomic Complexity of CMFs. (A)** Chondromyxoid fibroma with chromothripsis. Over 500 rearrangements can be detected by genome sequencing in this sample, with three *SHPRH* breakpoints. A *FRMD6-GRMI* fusion is predicted based on the genomic breakpoint (exon 1) of *FRMD6*, as indicated by the question mark (?). **(B)** Chondromyxoid fibroma with chromoplexy. A simple three-way rearrangement loop involving a deletion bridge on chromosome 9 was observed, predicted to generate the *MYO1E-GRMI* fusion. **(C)** Genomic rearrangements generating the canonical fusion in this cancer type do not directly affect the *GRMI* gene, but rather the *SHPRH* gene, which is the immediate 5' gene (directly upstream), as depicted in this figure. **(D)** In our three samples with genomic complexity generating *GRMI* fusions, the breakpoints appear to cluster within an 18-kb region within the *SHPRH* gene.

# Enlarged Figure 3A for readability

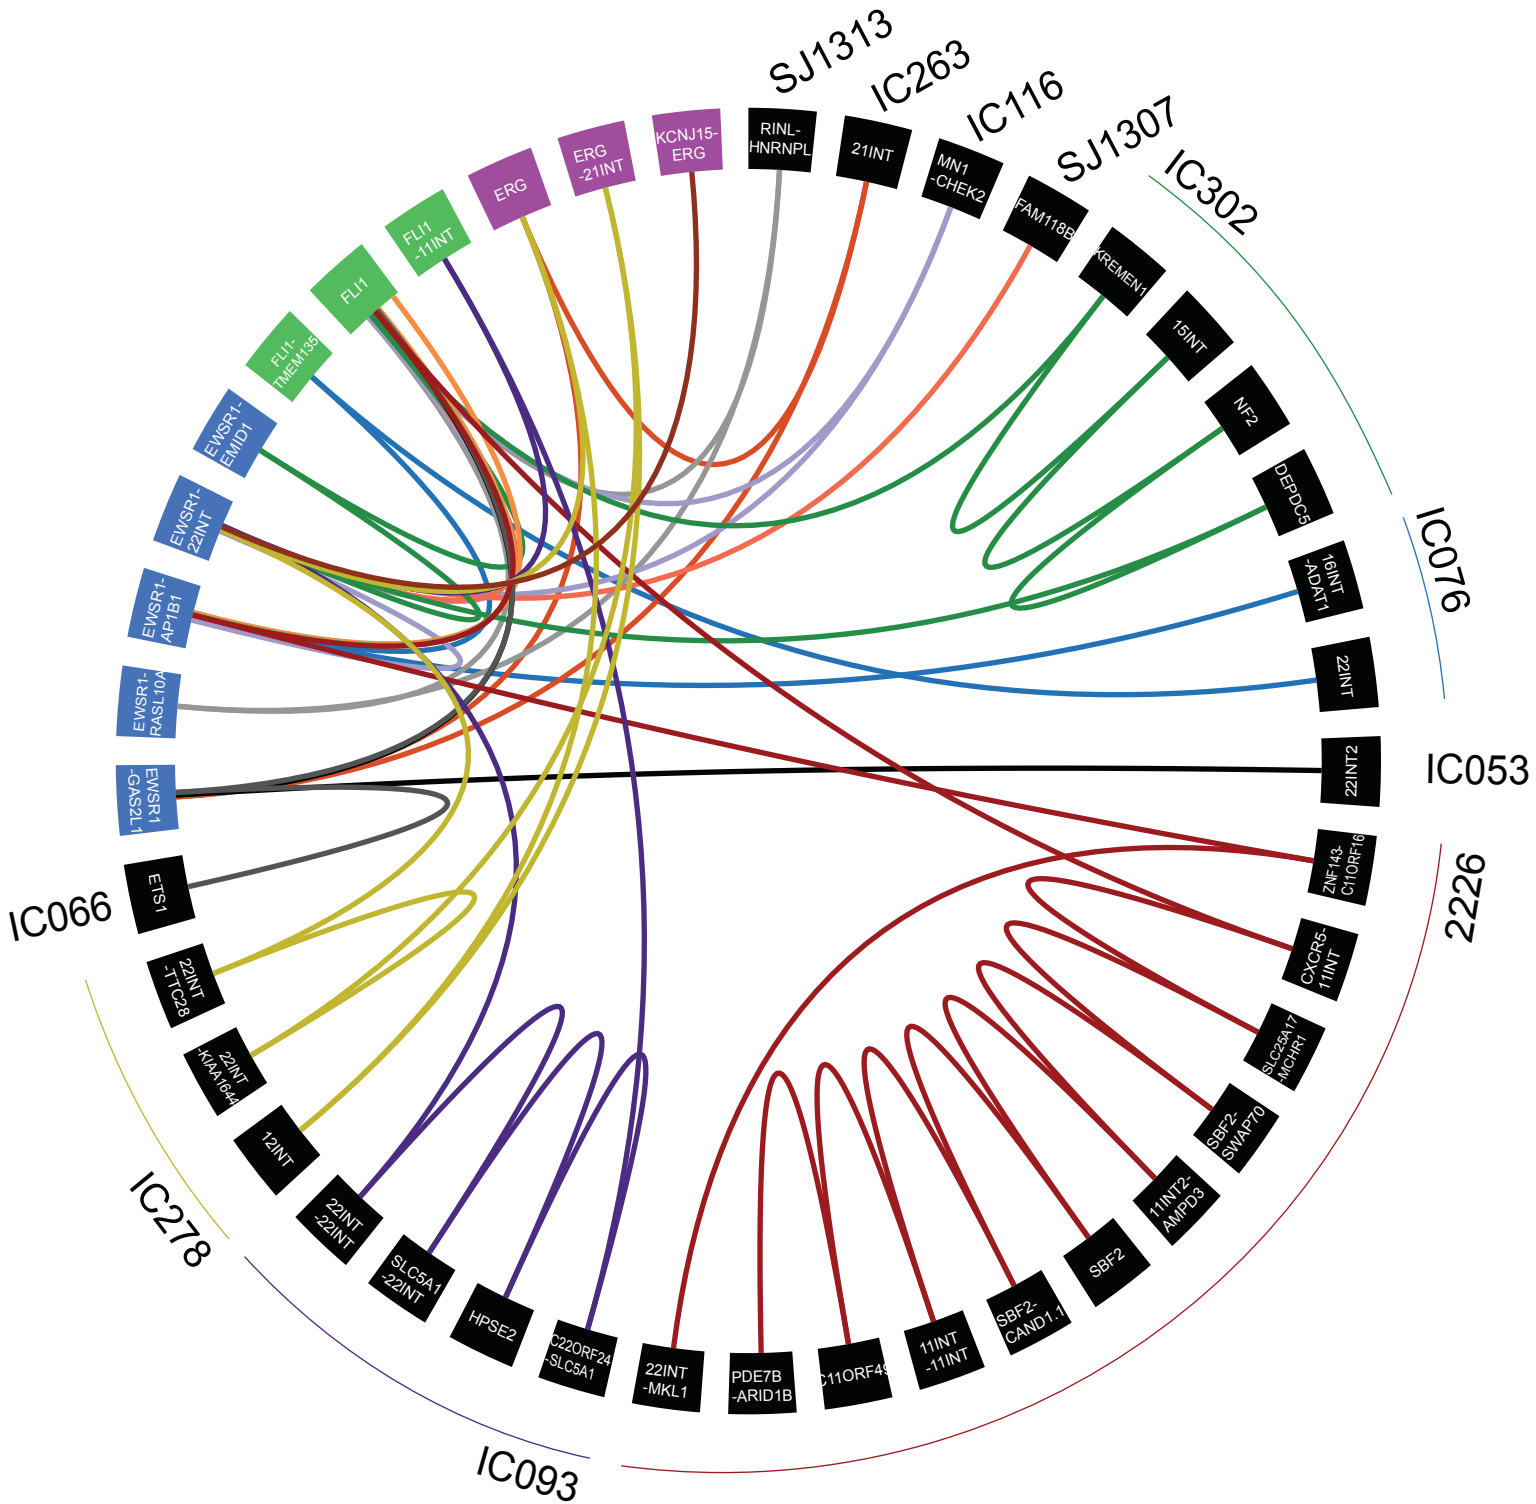

**Fig. S9. Enlarged Figure 3A for Readability.** Circos web is enlarged “deletion-bridge” (DB) chromoplexy in order to identify genes/loci disrupted by these rearranegments. DB chromoplexy occurs in a loop-structure, but the breakpoints are linked due to the intervening loss of DNA (illustrated in fig.S11)

Four-part (n=8)

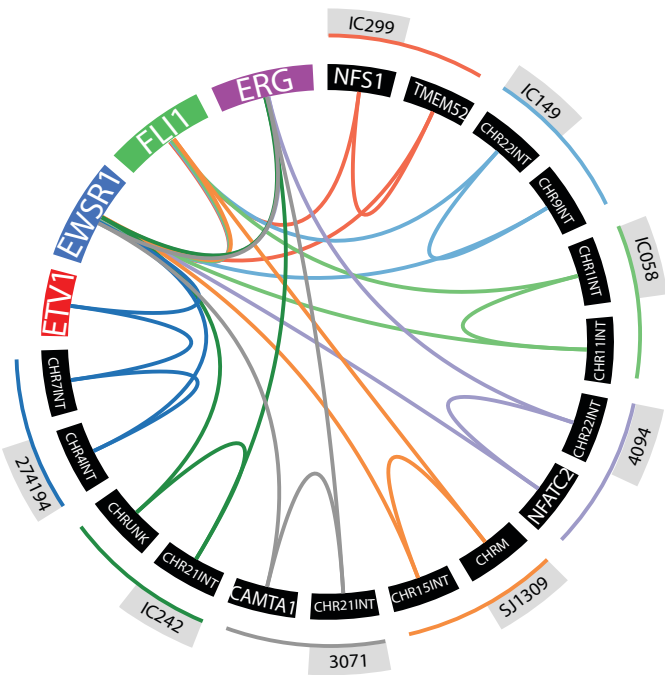

Five or six-part (n=6)

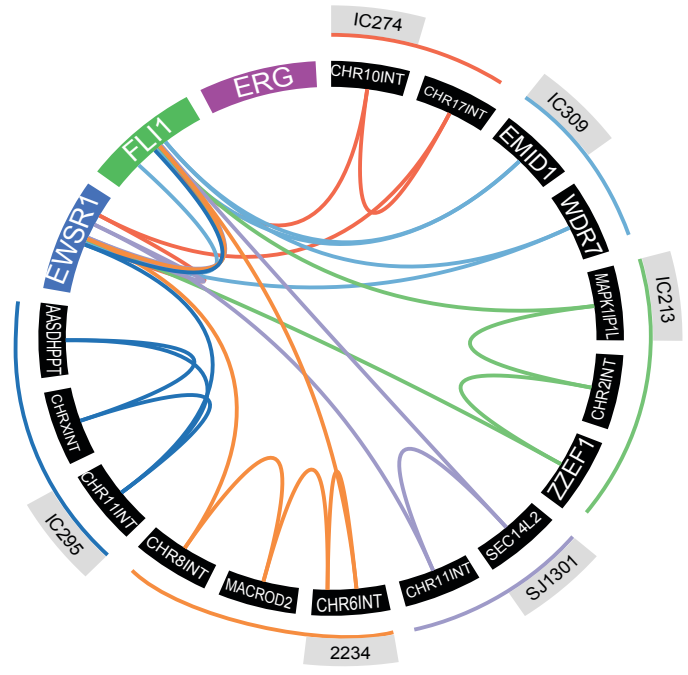

>Seven-part (n=5)

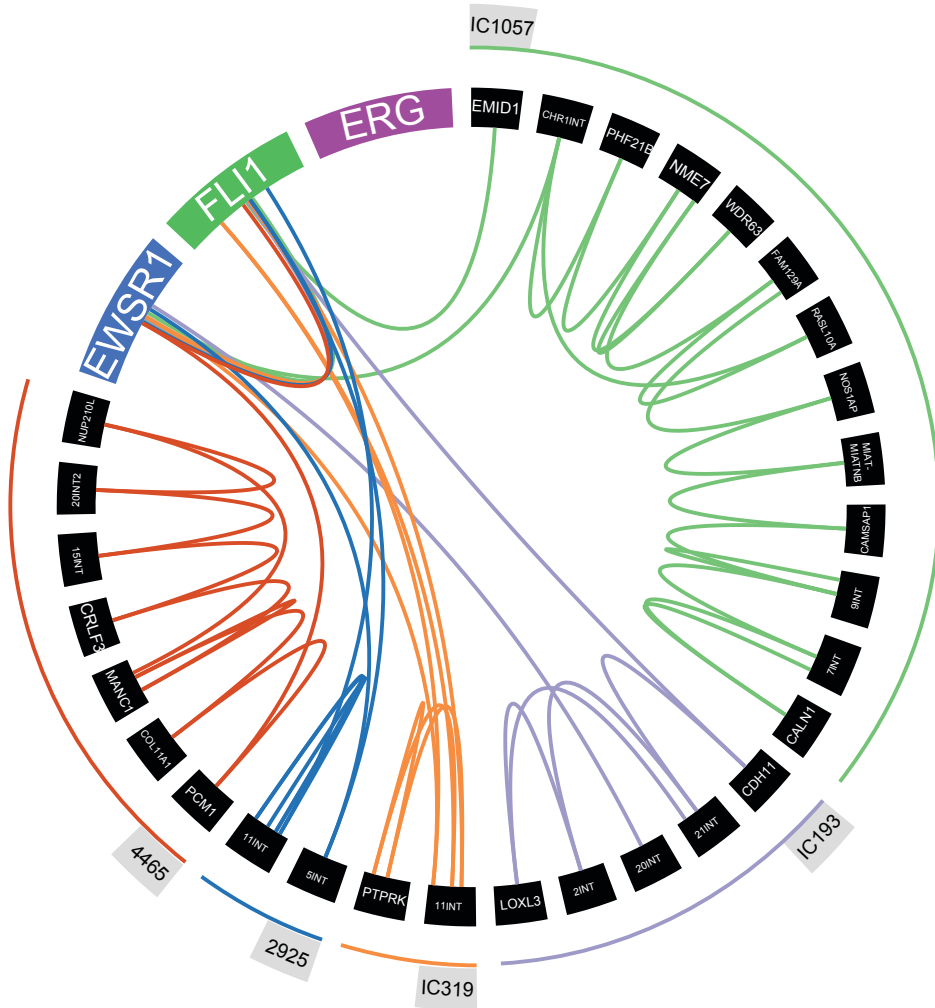

**Figure S10. Consequences of Chromoplexy. (A)** Circos webs illustrate the chromoplexy fusion loop patterns in ES, from four-part to greater than seven-part. *EWSR1*, *FLII* and *ERG* are central to all loops. Other complex cases include open and non-EWS loops (n=5, each). One exceptionally rare case of an *EWSR1-ETV1* fusion (red, four-part loop) was detected at the core of a chromoplexy fusion loop.

# A

## Simple Reciprocal

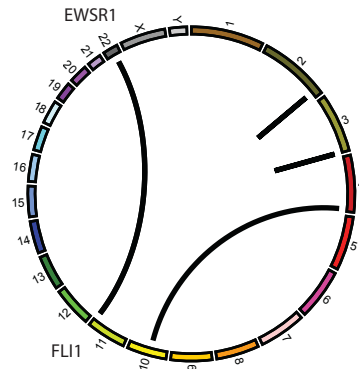

EWSR1

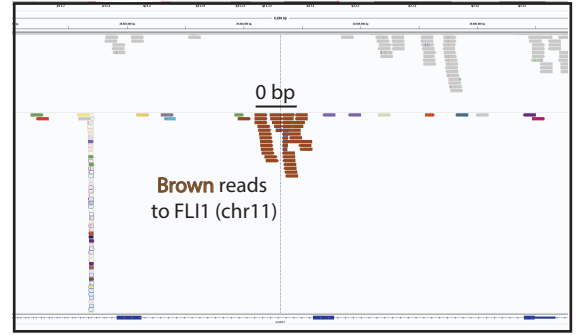

## Chromoplexy

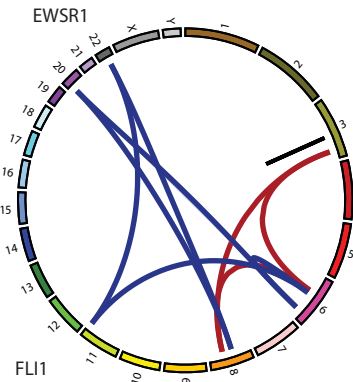

EWSR1

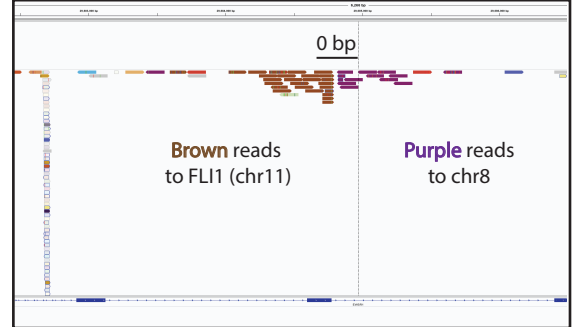

## DB Chromoplexy

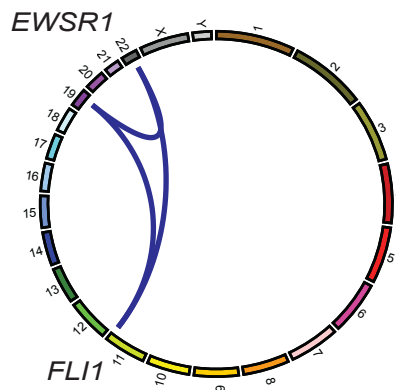

EWSR1

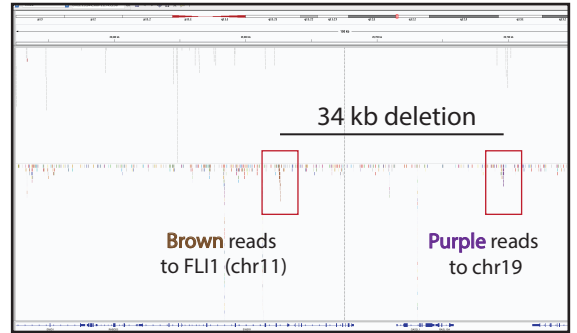

# B

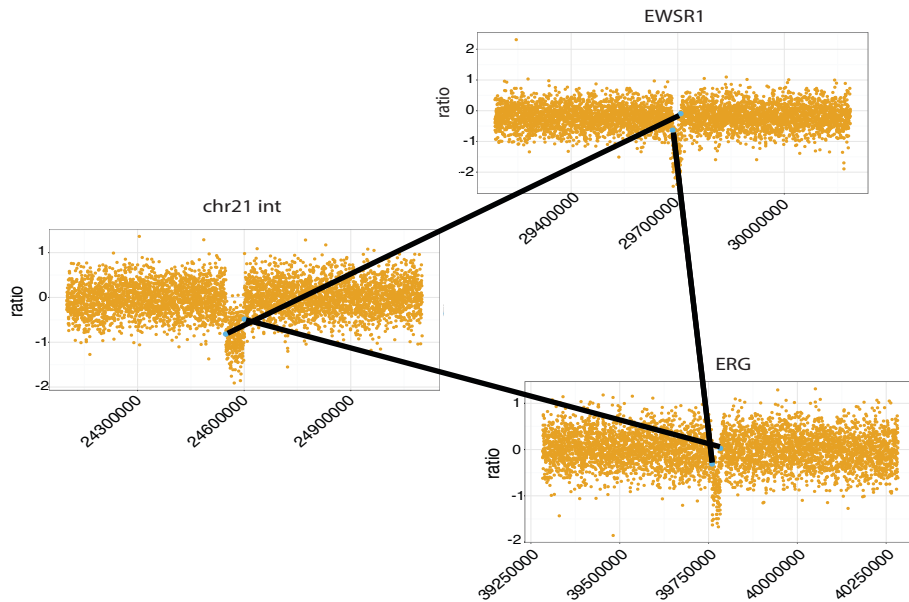

**Fig. S11. Deletion Bridges are common in Ewing sarcoma. (A)** Representative circos plots and integrated genomics viewer (IGV) screenshots illustrate how breakpoint distances are calculated. Simple reciprocal translocations (top) have no complexity and the breakpoints are right next to each other (>100bp apart). Chromoplectic rearrangements (middle) look similar to reciprocal translocations with respect to breakpoint distances, however the forward and reverse reads go to different chromosomes (brown reads to chr11 vs purple reads to chr8). Lastly, deletion-bridge (DB) chromoplexy (bottom) are further apart as a DNA deletion spans the two breakpoints with the forward and reverse reads going to different chromosomes (characteristic of chromoplexy). **(B)** Example of consistent deletion bridges across all chromoplectic loci. Loss of genetic material at chromoplectic loci joins adjacent breakpoints.



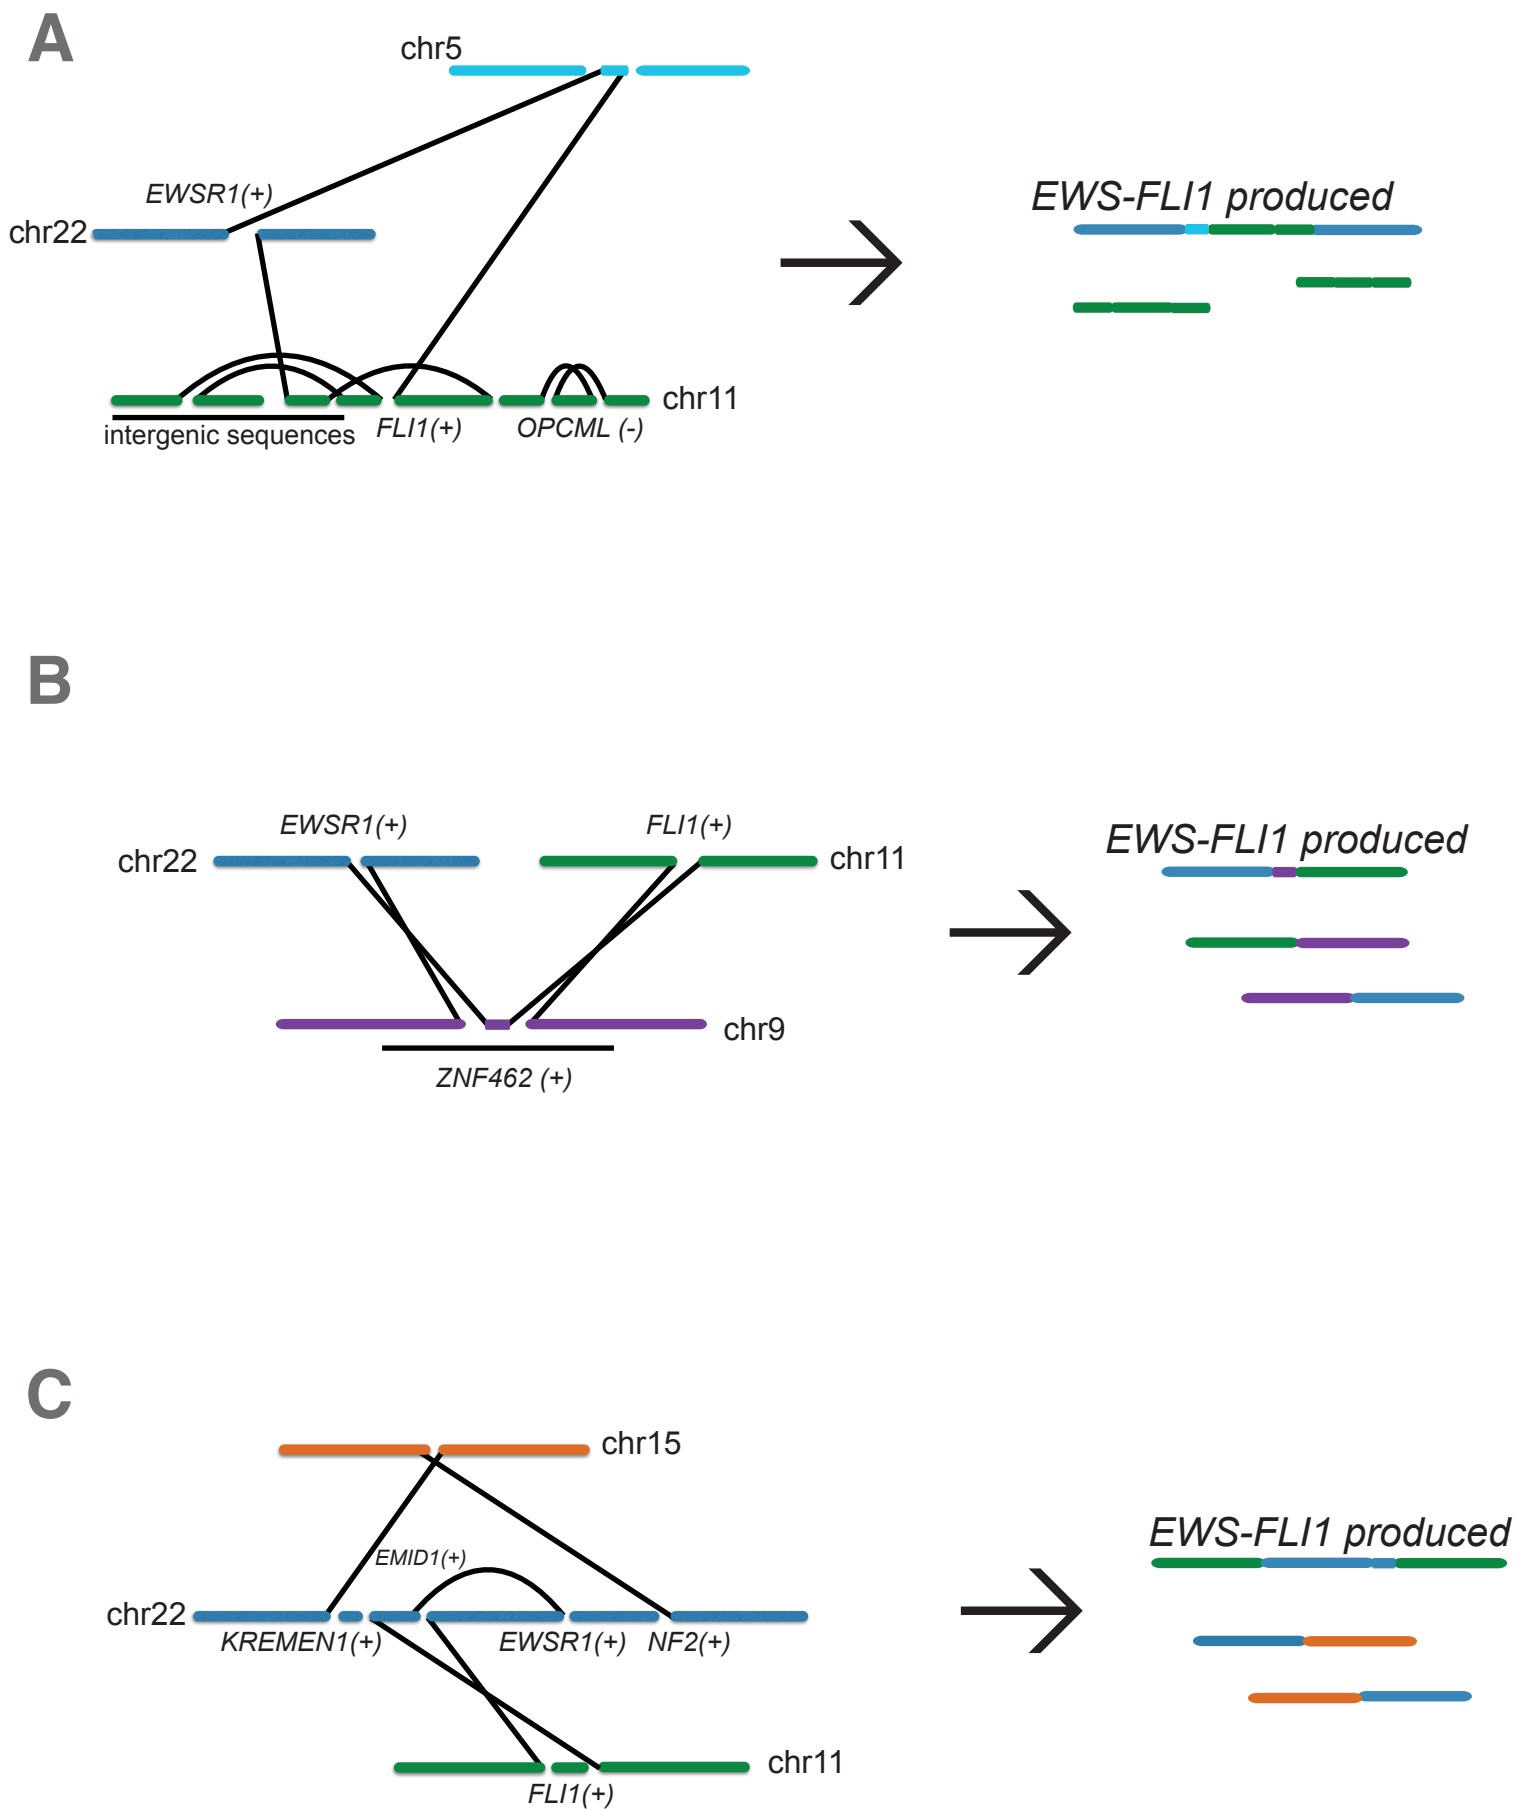

**Fig. S12. Chromoplexy acts as a molecular scaffold to produce the EWS-FLI1 driver.** Two rearrangements and a third locus are required to bring together *EWSR1* and *FLI1*. In these cases, no direct *EWSR1-FLI1* translocation can be detected using genome sequencing. However, a diagnostic fusion is detected at the transcriptional level. Most of these scaffolding events would be missed by cytogenetics, as an *EWSR1* break-apart FISH would show that these are *EWSR1*-rearranged tumors and G-band karyotyping would show the classical t(11;22) karyotype. **(A)** The 5' portion of *EWSR1* is translocated to chromosome 5 and similarly, the 3' portion of *FLI1* is translocated to the same chromosome and position. A functional *EWSR1-FLI1* driver is produced transcriptionally. **(B)** In a double reciprocal translocation event, the 5' of *EWSR1* and the 3' of *FLI1* are both translocated to the *ZNF462* gene on chromosome 9 and an *EWSR1-FLI1* transcript is detected at the RNA level. **(C)** An inversion between two adjacent genes, *EWSR1* and *EMID1*, and an *EMID1-FLI1* translocation can be observed in the genome and a canonical *EWSR1-FLI1* fusion transcript is detected in the RNA.

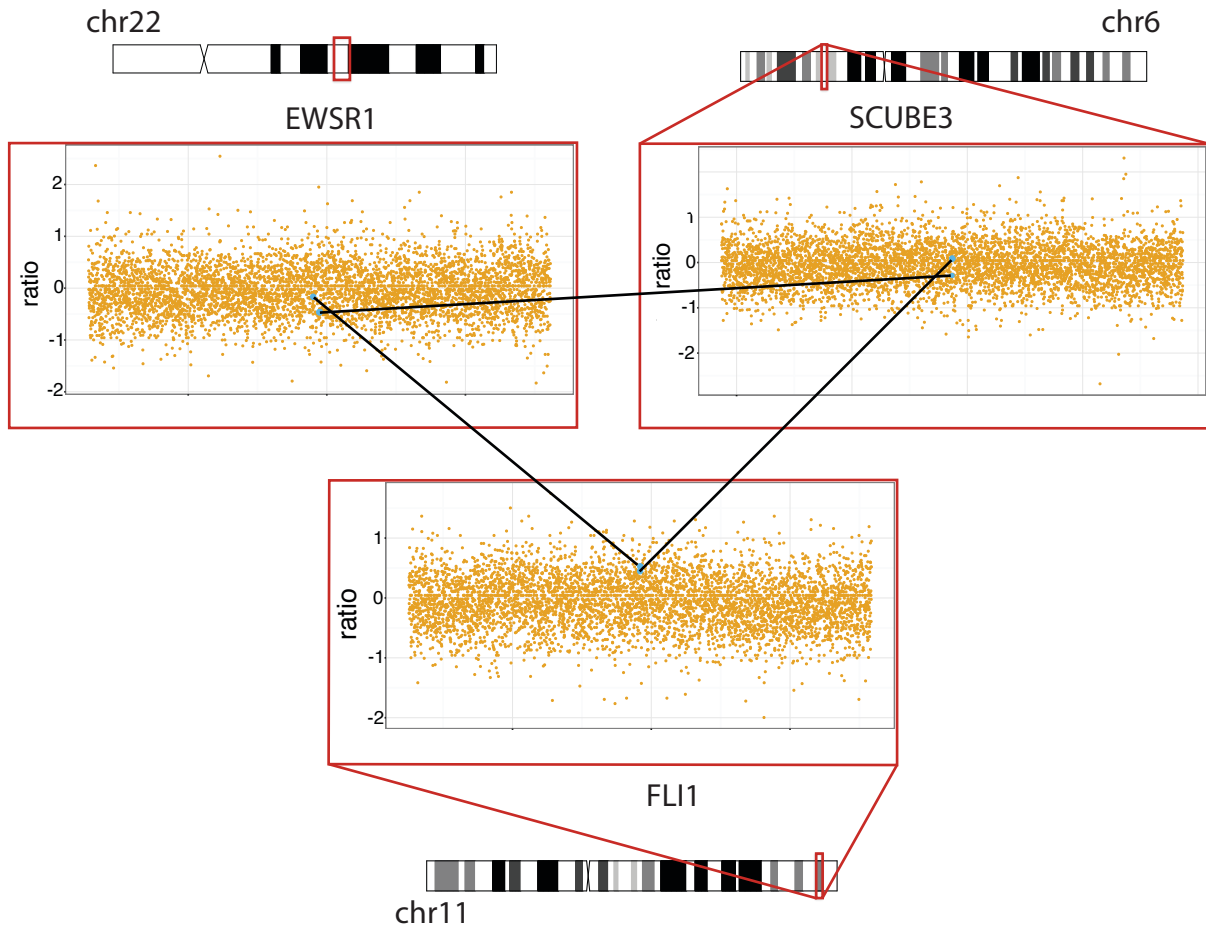

**Fig. S13. Copy-number state suggests a one-off burst of rearrangements.** A focused view (1MB window) of chromoplexy illustrates that there is copy-neutrality at chromoplectic breakpoint loci suggesting the mechanism of chromoplexy is a one-off mutation burst. A three-way rearrangement pattern is depicted.

A

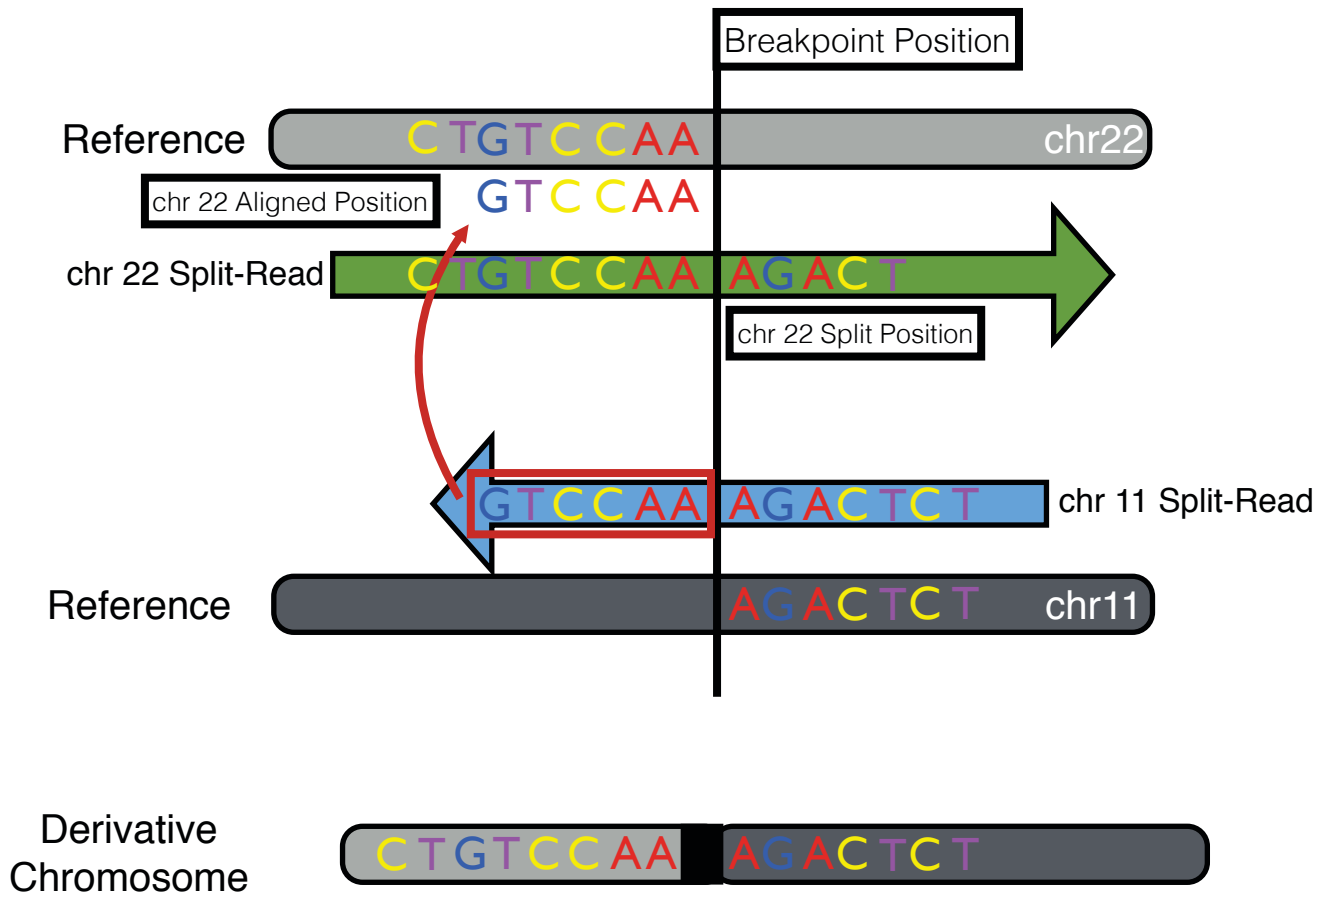

B

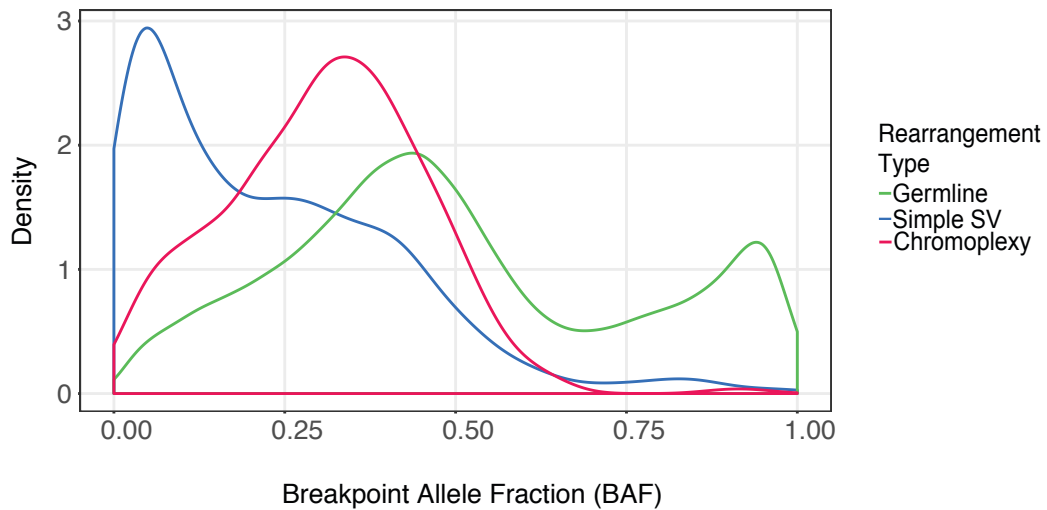

**Fig. S14. Calculating and evaluating the breakpoint allele fraction (BAF).** The breakpoint allele fraction (BAF) is the proportion of reads supporting the breakpoint of a rearrangement compared to the local coverage and is analogous to a variant allele fraction (VAF). A higher BAF signifies an early rearrangement. **(A)** A schematic representation of how the BAF is calculated. Breakpoint-containing reads map to the reference (chr22), but contain nucleotide bases that map elsewhere in the genome (chr11). The position where this transition occurs is the split position. Our tool maps split reads to the other chromosome. Split-reads from the other side of the rearrangement (chr11) are mapped to side 1 (chr22). The aligned position is represented by read alignments. The BAF is calculated by dividing the number of split-reads (split and aligned) by the total coverage. **(B)** BAFs demonstrate that chromoplectic rearrangements (pink) arise earlier than simple structural variants (blue) given the higher breakpoint allele frequency (BAF). As a control, germline structural variants (green) are plotted and exhibit a bimodal distribution at 0.5 and 1.0, as expected.

**A**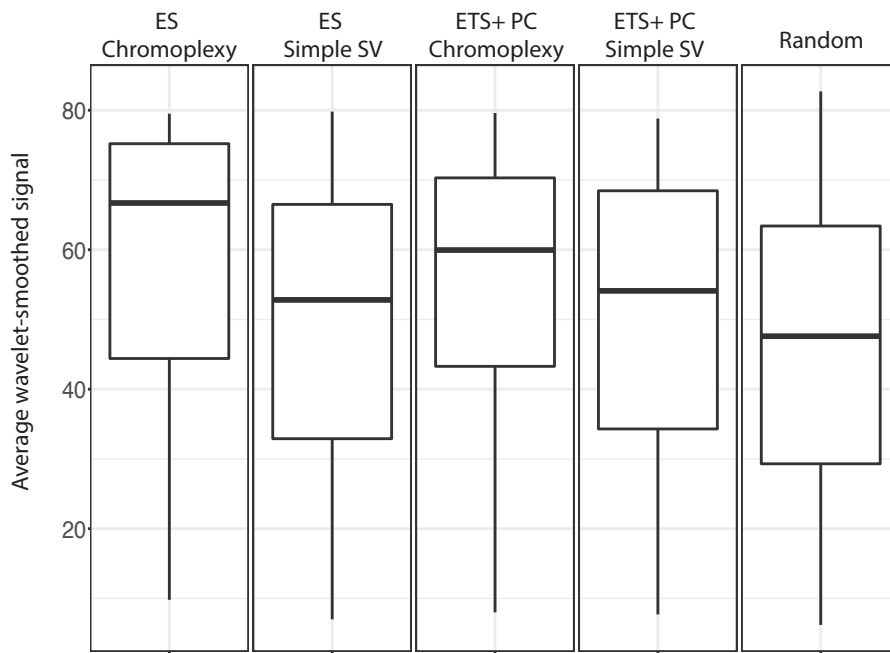**B**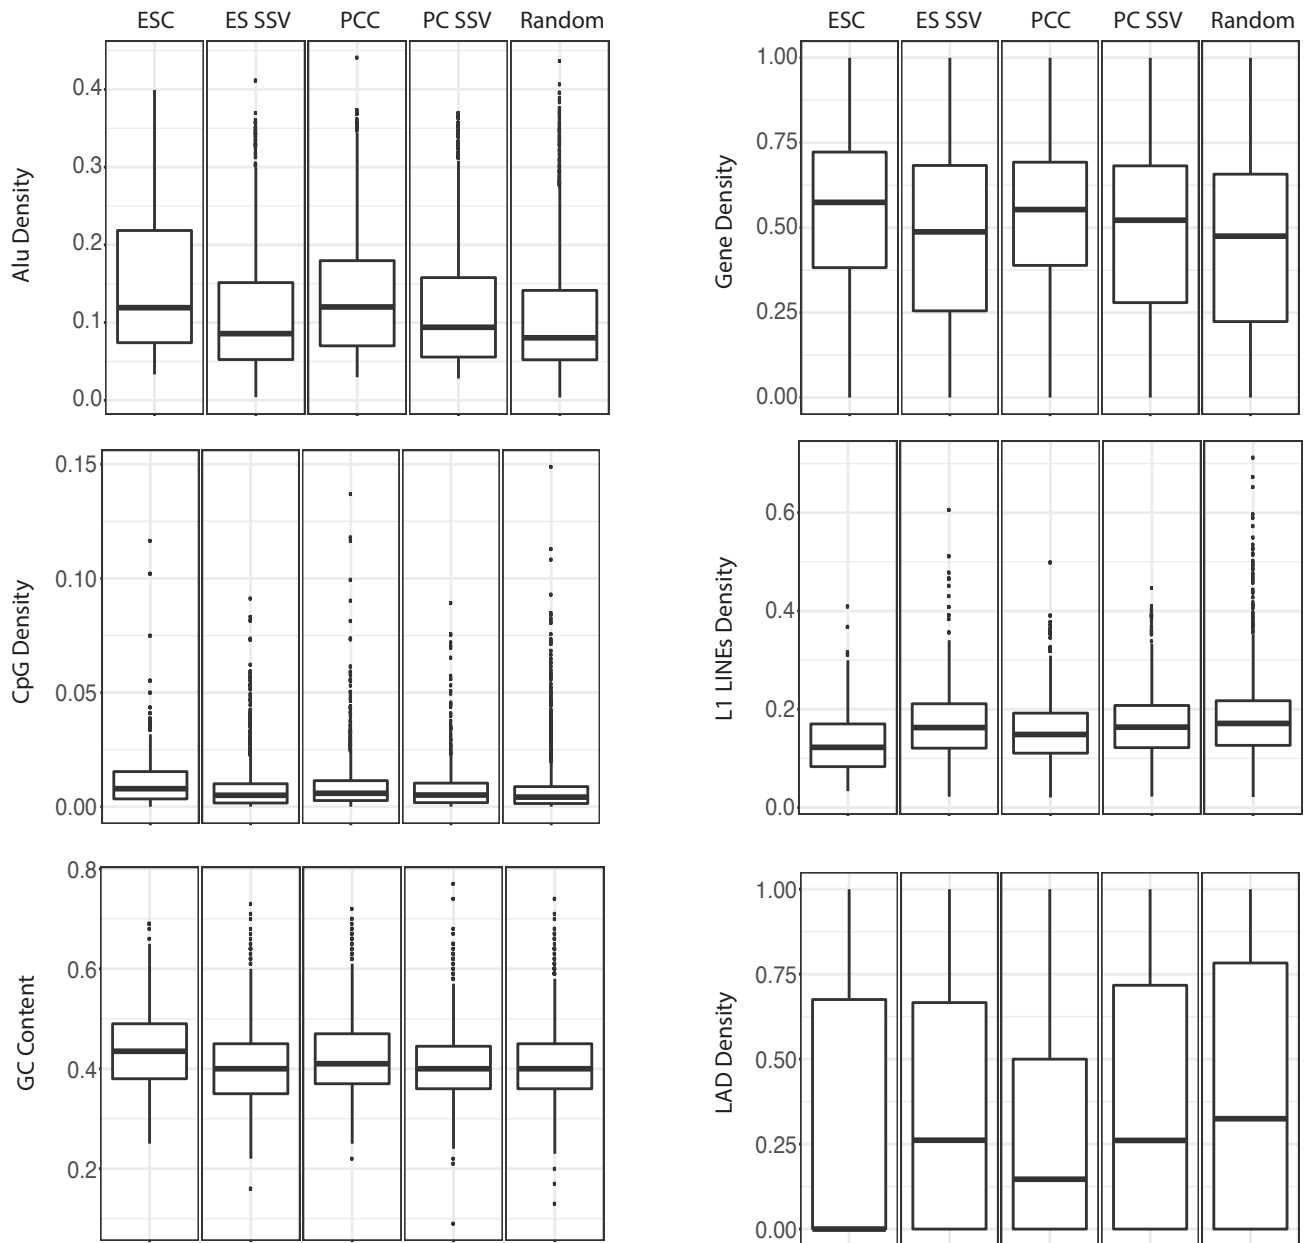

**Fig. S15. Chromoplexy rearrangements are consistent with early replication timing.** (A) Genomic property analysis demonstrates that chromoplexy in Ewing sarcoma is strongly associated replication timing. The average wavelet-smoothed signal (WSS) shows chromoplectic rearrangements have a higher average WSS than simple structural variants or random points. This suggests chromoplexy is associated with early replication timing. This is also true for ETS+ Prostate cancer (B) Other features of the genome also support the association of Ewing chromoplexy (ESC) with early replication timing. Ewing chromoplexy rearrangements have higher GC content, Alu Density, gene density, and CpG island density. Other features such as L1 LINEs and lamina-associated domains (LADs) were depleted around chromoplexy regions. These features supporting early replication timing have a Cohen's d equal to or greater than 0.3 and a corrected p-value less than 0.5. This is not observed in Ewing simple structural variants (ESSV). Other features consistent with early replication timing in ETS+ Prostate Cancer (PCC) are high Alu density and depletions in LADs and L1 LINEs. All feature density metrics are in 1MB sliding windows centered at 1kb bins, except for GC content which was calculated in a 1 kb bin (see table S4).

## Chromoplexy genes expressed in the top 20% of all expressed genes

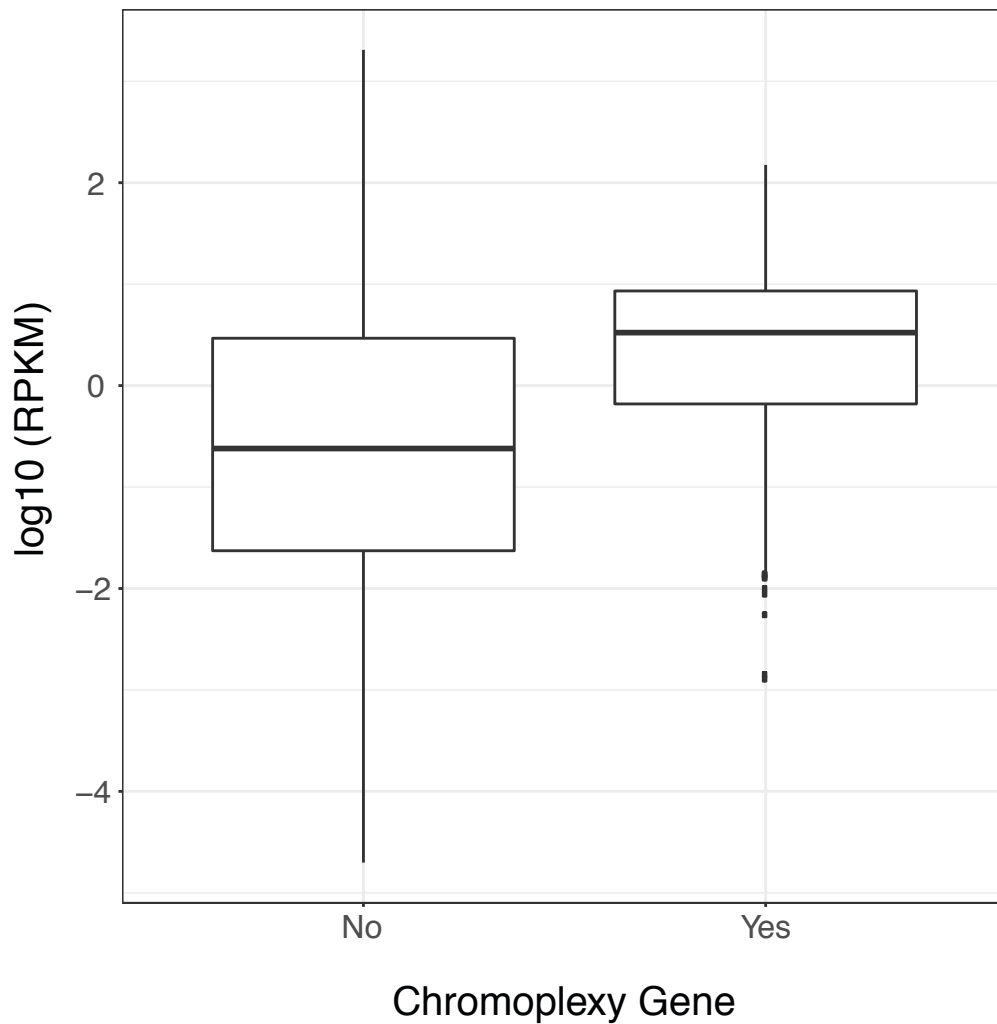

**Fig. S16. Global chromoplexy gene expression.** Boxplot depicts global transcriptional activity (read per kilobase per million: RPKM) for chromoplexy genes and other expressed genes in the transcriptome. Chromoplexy genes are expressed in the top 20% of the most expressed genes in the transcriptome across the cohort.



Primary Tumor

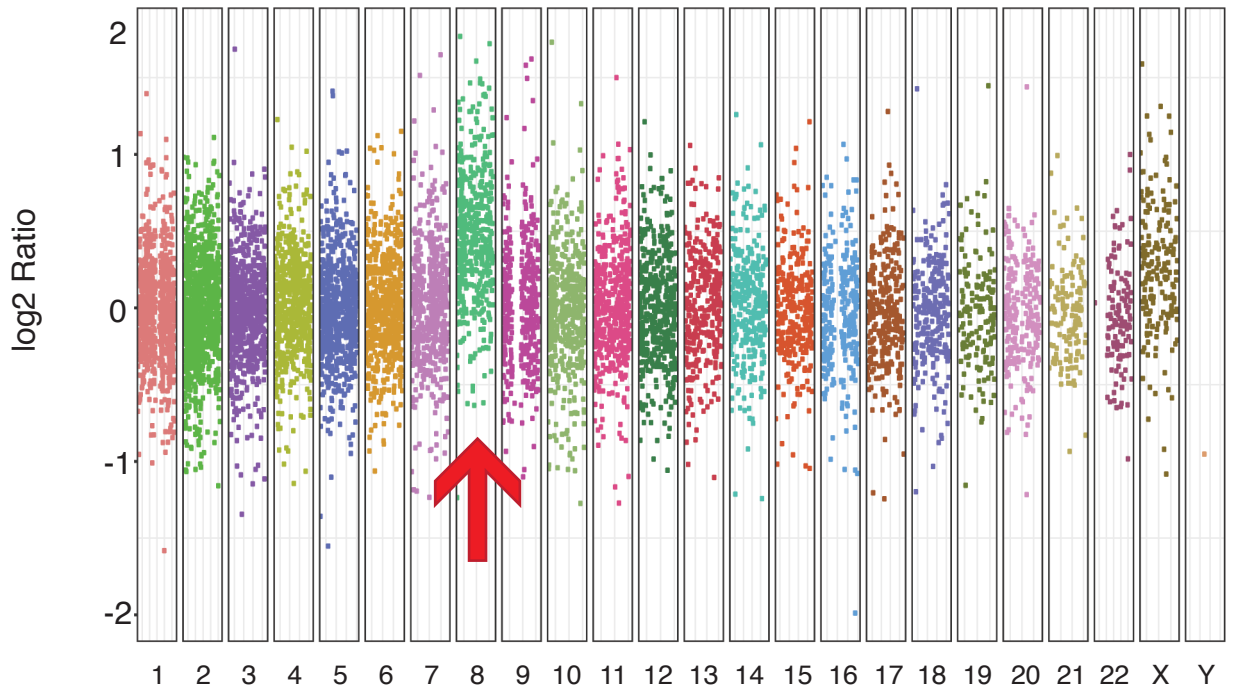

Metastatic Tumor

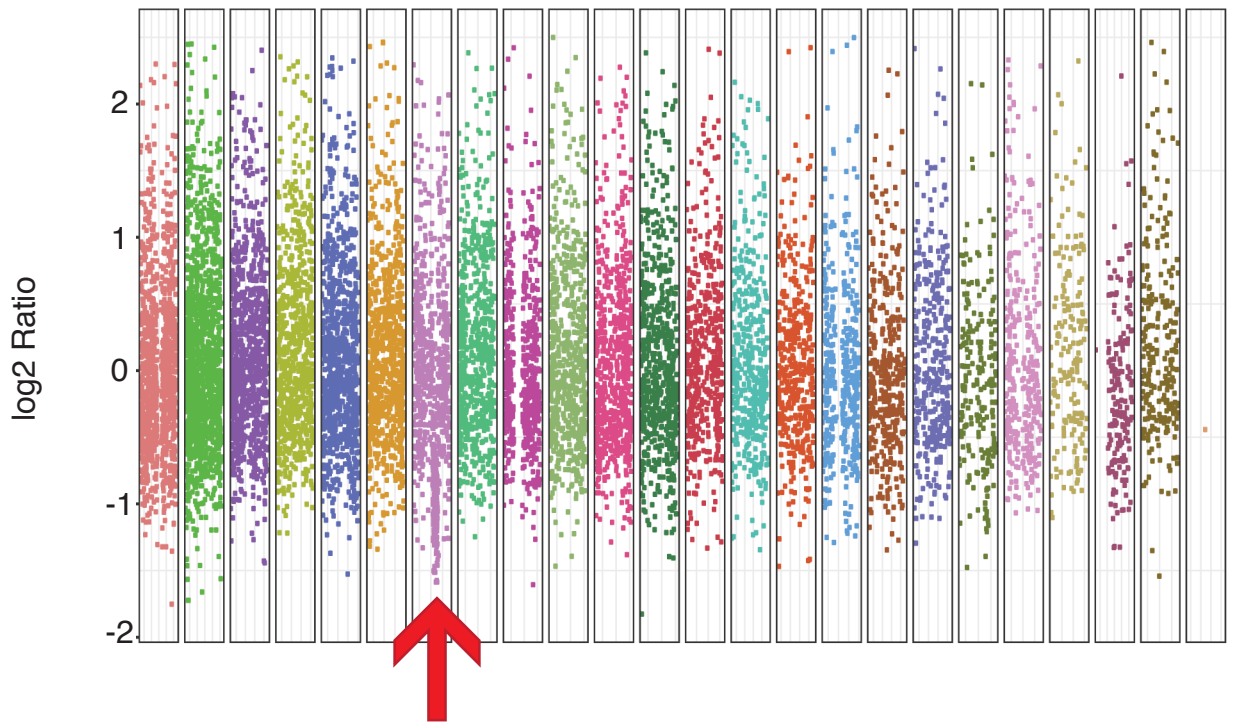

**Fig. S17. Molecular Inversion Probe (MIP) assay.** MIP copy number was determined for three primary-metastatic ES pairs. Data are shown for one pair in **(A)** and **(B)**. Large copy-number alterations are unique to the biopsy or metastatic tumor (red arrow) and are not shared, supporting a model early divergence and parallel evolution between primary and metastatic tumors in Ewing sarcoma.

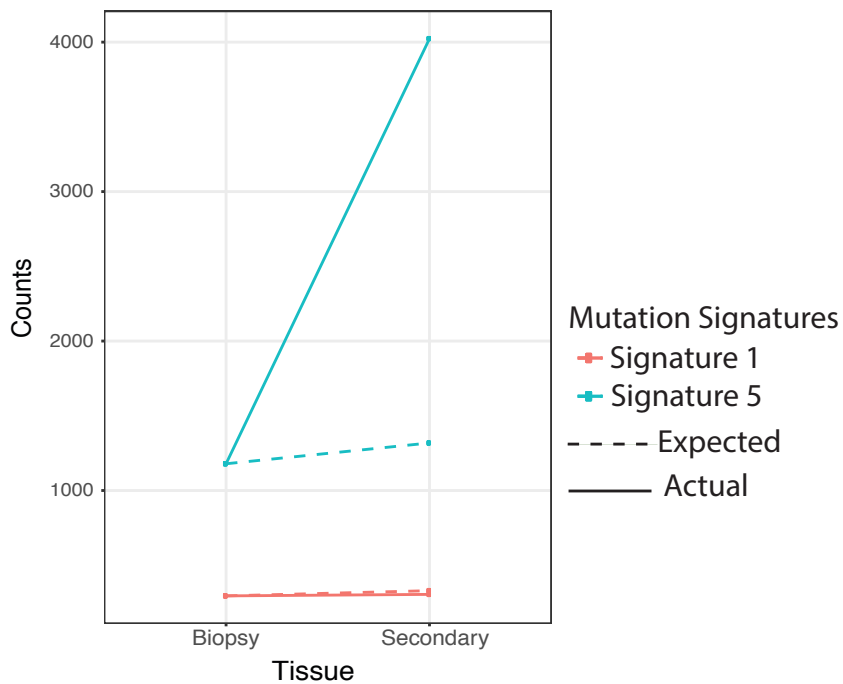

**Fig. S18. Validation of COSMIC Signature 1 consistency.** We calculated the Signature 1 mutation rate in an ES primary tumor and predicted the number of Signature 1 mutations that should arise in a relapse tumor 1.2 years later. Having sequenced the relapse material, we then calculated the observed Signature 1 mutation accumulation. The line graphs illustrate the consistency of Signature 1 between predicted (dotted line) and actual (solid line) values of primary and relapse tumors. We repeated the analysis for Signature 5 and did not see a steady mutation rate.

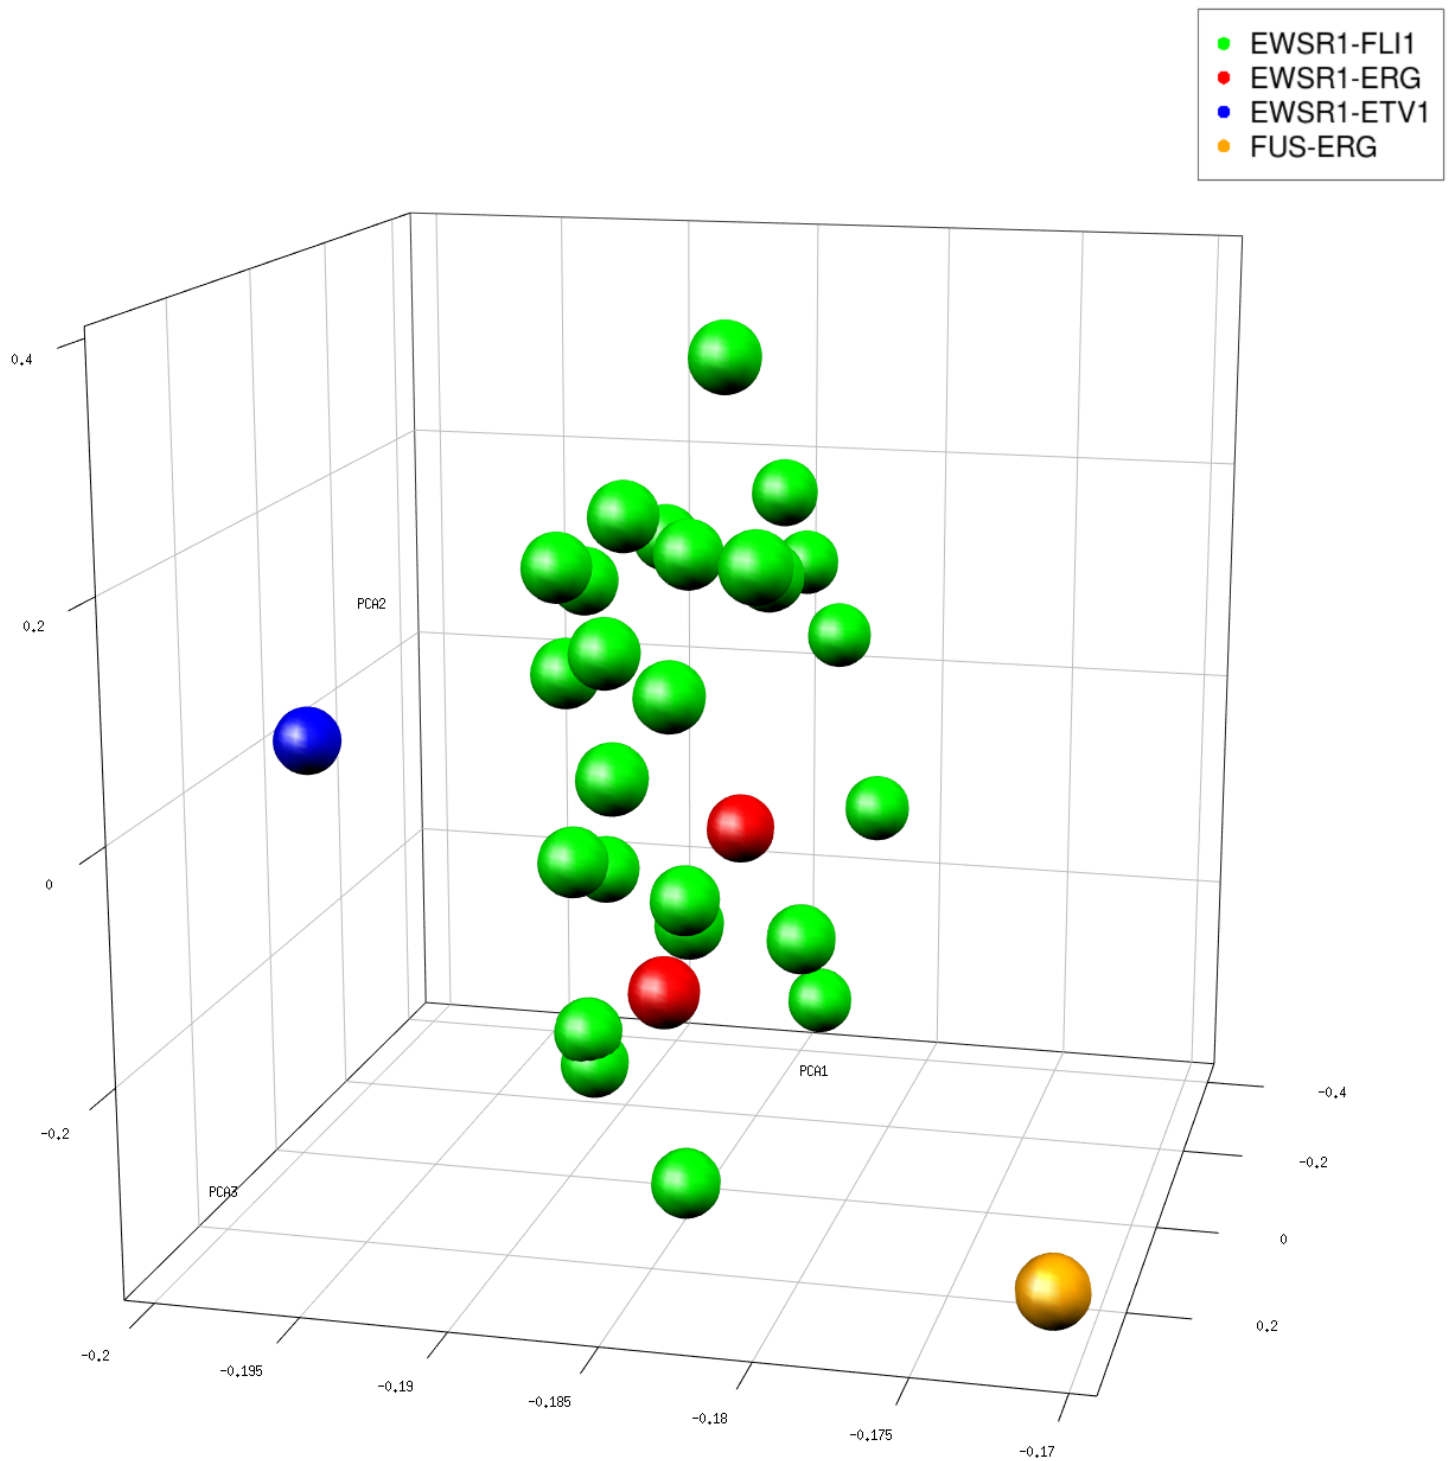

**Fig. S19. Principal Component Analysis (PCA) of Ewing sarcoma tumors.** PCA of Ewing sarcoma gene expression demonstrates that *EWSR1-FLI1* (green) and *EWSR1-ERG* (red) driven tumors cluster together by gene expression. Non-canonical *FUS-ERG* (gold) and *EWSR1-ETV1*(blue) fusion-driven tumors cluster separately. The *FUS-ERG* tumor is not *EWSR1*-rearranged and was omitted from this study.

**A**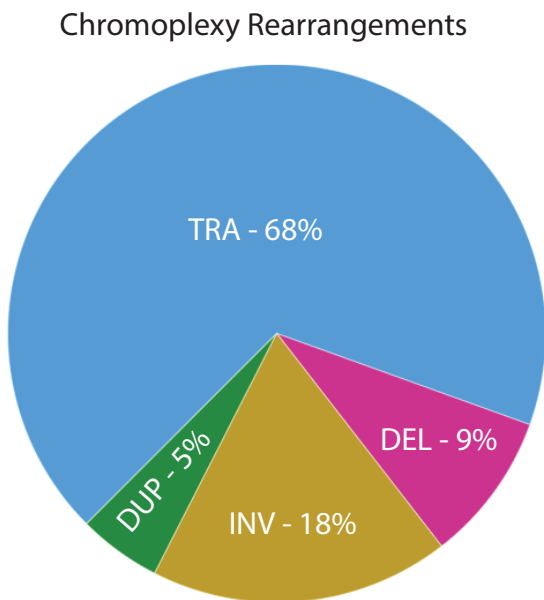**B**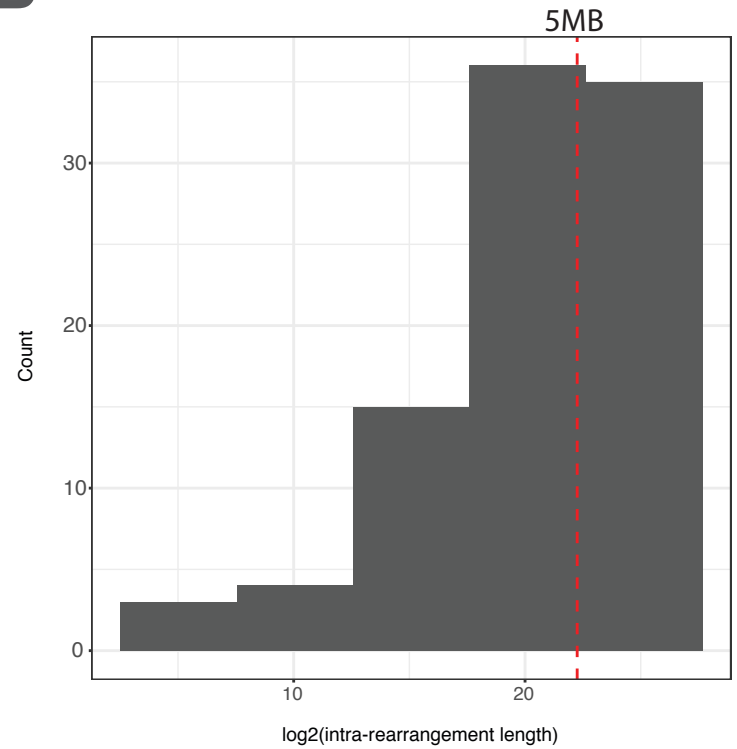

**Fig. S20. Prevalence of sub-microscopic rearrangements in ES chromoplexy.** (A) Pie chart characterizes the rearrangement subtypes of chromoplexy rearrangements (mainly translocations). (B) 32% of chromoplexy rearrangements are intra-chromosomal with a quarter of them being sub-microscopic (>5MB). These small intrachromosomal rearrangements (to the left of the red dotted line) would be missed by routine cytogenetics.

**Table S1. Ewing sarcoma sequencing.** We performed whole-genome sequencing (WGS) to a depth of either 30-60x (high coverage) or ~10x (rearrangement screen) for 37 Ewing sarcoma tumors. This study focused on the analysis of the high coverage genomes. One rearrangement screen was included as it had unexpectedly high coverage (~20x, orange). For all high coverage genomes, greater than 96% of the reads successfully aligned to the reference genome. To identify transcriptional consequences of mutations, we performed RNA-sequencing on 24 tumors, of which 10 exhibited patterns of chromoplexy. Whole-exome sequencing was also performed on select samples, as indicated. The average coverage of the WES samples was 85x. Finally, we obtained raw sequencing reads from 112 Ewing sarcoma genomes reported by Tirode, Durdez et al. 2014 *Cancer Discovery* to validate our findings.

Toronto Cohort

| Platform Overlap Counts | 30-60X WGS | 10X WGS   | RNA-Seq   | WES       |
|-------------------------|------------|-----------|-----------|-----------|
| 1                       |            |           |           |           |
| 2                       |            |           |           |           |
| 3                       |            |           |           |           |
| 4                       |            |           |           |           |
| 5                       |            |           |           |           |
| 6                       |            |           |           |           |
| 7                       |            |           |           |           |
| 1                       |            |           |           |           |
| 2                       |            |           |           |           |
| 3                       |            |           |           |           |
| 4                       |            |           |           |           |
| 5                       |            |           |           |           |
| 6                       |            |           |           |           |
| 7                       |            |           |           |           |
| 8                       |            |           |           |           |
| 9                       |            |           |           |           |
| 10                      |            |           |           |           |
| 11                      |            |           |           |           |
| 12                      |            |           |           |           |
| 1                       |            |           |           |           |
| 2                       |            |           |           |           |
| 3                       |            |           |           |           |
| 4                       |            |           |           |           |
| 5                       |            |           |           |           |
| 6                       |            |           |           |           |
| 7                       |            |           |           |           |
| 1                       |            |           |           |           |
| 2                       |            |           |           |           |
| 3                       |            |           |           |           |
| 4                       |            |           |           |           |
| 5                       |            |           |           |           |
| 6                       |            |           |           |           |
| 7                       |            |           |           |           |
| 1                       |            |           |           |           |
| 2                       |            |           |           |           |
| 3                       |            |           |           |           |
| 4                       |            |           |           |           |
| 5                       |            |           |           |           |
| 6                       |            |           |           |           |
| 7                       |            |           |           |           |
| 8                       |            |           |           |           |
| Total: 50               | Total: 25  | Total: 19 | Total: 24 | Total: 29 |

Validation Cohort

| Platform Overlap Counts | 30-60X WGS | 10X WGS | RNA-Seq | WES |
|-------------------------|------------|---------|---------|-----|
| 1                       |            |         |         |     |
| 2                       |            |         |         |     |
| 3                       |            |         |         |     |
| 4                       |            |         |         |     |
| 5                       |            |         |         |     |
| 6                       |            |         |         |     |
| 7                       |            |         |         |     |
| 8                       |            |         |         |     |
| 9                       |            |         |         |     |
| 10                      |            |         |         |     |
| 11                      |            |         |         |     |
| 12                      |            |         |         |     |
| 13                      |            |         |         |     |
| 14                      |            |         |         |     |
| 15                      |            |         |         |     |
| 16                      |            |         |         |     |
| 17                      |            |         |         |     |
| 18                      |            |         |         |     |
| 19                      |            |         |         |     |
| 20                      |            |         |         |     |
| 21                      |            |         |         |     |
| 22                      |            |         |         |     |
| 23                      |            |         |         |     |
| 24                      |            |         |         |     |
| 25                      |            |         |         |     |
| 26                      |            |         |         |     |
| 27                      |            |         |         |     |
| 28                      |            |         |         |     |
| 29                      |            |         |         |     |
| 30                      |            |         |         |     |
| 31                      |            |         |         |     |
| 32                      |            |         |         |     |
| 33                      |            |         |         |     |
| 34                      |            |         |         |     |
| 35                      |            |         |         |     |
| 36                      |            |         |         |     |
| 37                      |            |         |         |     |
| 38                      |            |         |         |     |
| 39                      |            |         |         |     |
| 40                      |            |         |         |     |
| 41                      |            |         |         |     |
| 42                      |            |         |         |     |
| 43                      |            |         |         |     |
| 44                      |            |         |         |     |
| 45                      |            |         |         |     |
| 46                      |            |         |         |     |
| 47                      |            |         |         |     |
| 48                      |            |         |         |     |
| 49                      |            |         |         |     |
| 50                      |            |         |         |     |
| 51                      |            |         |         |     |
| 52                      |            |         |         |     |
| 53                      |            |         |         |     |
| 54                      |            |         |         |     |
| 55                      |            |         |         |     |
| 56                      |            |         |         |     |
| 57                      |            |         |         |     |
| 58                      |            |         |         |     |
| 59                      |            |         |         |     |
| 60                      |            |         |         |     |
| 61                      |            |         |         |     |
| 62                      |            |         |         |     |
| 63                      |            |         |         |     |
| 64                      |            |         |         |     |
| 65                      |            |         |         |     |
| 66                      |            |         |         |     |
| 67                      |            |         |         |     |
| 68                      |            |         |         |     |
| 69                      |            |         |         |     |
| 70                      |            |         |         |     |
| 71                      |            |         |         |     |
| 72                      |            |         |         |     |
| 73                      |            |         |         |     |
| 74                      |            |         |         |     |
| 75                      |            |         |         |     |
| 76                      |            |         |         |     |
| 77                      |            |         |         |     |
| 78                      |            |         |         |     |
| 79                      |            |         |         |     |
| 80                      |            |         |         |     |
| 81                      |            |         |         |     |
| 82                      |            |         |         |     |
| 83                      |            |         |         |     |
| 84                      |            |         |         |     |
| 85                      |            |         |         |     |
| 86                      |            |         |         |     |
| 87                      |            |         |         |     |
| 88                      |            |         |         |     |
| 89                      |            |         |         |     |
| 90                      |            |         |         |     |
| 91                      |            |         |         |     |
| 92                      |            |         |         |     |
| 93                      |            |         |         |     |
| 94                      |            |         |         |     |
| 95                      |            |         |         |     |
| 96                      |            |         |         |     |
| 97                      |            |         |         |     |
| 98                      |            |         |         |     |
| 99                      |            |         |         |     |
| 100                     |            |         |         |     |
| 101                     |            |         |         |     |
| 102                     |            |         |         |     |
| 103                     |            |         |         |     |
| 104                     |            |         |         |     |
| 105                     |            |         |         |     |
| 106                     |            |         |         |     |
| 107                     |            |         |         |     |
| 108                     |            |         |         |     |
| 109                     |            |         |         |     |
| 110                     |            |         |         |     |
| 111                     |            |         |         |     |
| 112                     |            |         |         |     |

**Table S2. Disease-defining fusions in sarcomas.** We performed low-pass or high-depth whole genome sequencing on 13 sarcomas with known disease-defining fusions. RNA was available for two samples (PD7514 and PD7515).

| Tumor type                     | Canonical fusion     | Number of fusion positive tumors screened | Tumor IDs                                | Rearrangement bursts with fusion | Tumor IDs                   |
|--------------------------------|----------------------|-------------------------------------------|------------------------------------------|----------------------------------|-----------------------------|
| Phosphaturic mesenchymal tumor | FN1-FGFR1            | 1                                         | PD13472                                  | 1                                | PD13472                     |
| Chondromyxoid fibroma          | Variable-GRM1 fusion | 4                                         | PD7514a<br>PD7515a<br>PD10079<br>PD10080 | 3                                | PD7514<br>PD7515<br>PD10079 |
| Synovial sarcoma               | SS18-SSX             | 2                                         | PD19375<br>PD19398                       | 1                                | PD19398                     |
| Solitary fibrous tumor         | NAB2-STAT6           | 6                                         | PD20639<br>PD20640<br>PD20667            | 0                                | -                           |

**Table S3. Gene Set Enrichment Analysis (GSEA).** A GSEA of hallmark pathways shows 30/50 pathways dysregulated in chromoplexy ES transcriptomes, which are listed here.

| Gene Set Name                     | Description                                                                                                | Adjusted p-value |
|-----------------------------------|------------------------------------------------------------------------------------------------------------|------------------|
| ALLOGRAFT REJECTION               | <i>Genes up-regulated during transplant rejection.</i>                                                     | 7.00E-24         |
| INFLAMMATORY RESPONSE             | <i>Genes defining inflammatory response.</i>                                                               | 6.89E-18         |
| INTERFERON GAMMA RESPONSE         | <i>Genes up-regulated in response to IFNG [GeneID=3458].</i>                                               | 6.89E-18         |
| COMPLEMENT                        | <i>Genes encoding components of the complement system, which is part of the innate immune system.</i>      | 1.50E-14         |
| KRAS SIGNALING UP                 | <i>Genes up-regulated by KRAS activation.</i>                                                              | 1.75E-13         |
| IL6-JAK-STAT3 SIGNALING           | <i>Genes up-regulated by IL6 [GeneID=3569] via STAT3 [GeneID=6774], e.g., during acute phase response.</i> | 1.83E-13         |
| TNFA SIGNALING VIA NFKB           | <i>Genes regulated by NF-kB in response to TNF [GeneID=7124].</i>                                          | 1.92E-12         |
| IL2-STAT5 SIGNALING               | <i>Genes up-regulated by STAT5 in response to IL2 stimulation.</i>                                         | 1.98E-11         |
| UV RESPONSE DN                    | <i>Genes down-regulated in response to ultraviolet (UV) radiation.</i>                                     | 2.23E-09         |
| ADIPOGENESIS                      | <i>Genes up-regulated during adipocyte differentiation (adipogenesis)</i>                                  | 1.46E-08         |
| APICAL JUNCTION                   | <i>Genes encoding components of apical junction complex.</i>                                               | 1.14E-07         |
| HYPOXIA                           | <i>Genes up-regulated in response to low oxygen levels (hypoxia).</i>                                      | 8.20E-07         |
| APOPTOSIS                         | <i>Genes mediating programmed cell death (apoptosis) by activation of caspases.</i>                        | 4.97E-06         |
| EPITHELIAL MESENCHYMAL TRANSITION | <i>Genes defining epithelial-mesenchymal transition, as in wound healing, fibrosis and metastasis.</i>     | 5.43E-06         |
| ESTROGEN RESPONSE LATE            | <i>Genes defining late response to estrogen.</i>                                                           | 5.43E-06         |
| MYOGENESIS                        | <i>Genes involved in development of skeletal muscle (myogenesis)</i>                                       | 5.43E-06         |
| HEDGEHOG SIGNALING                | <i>Genes up-regulated by activation of hedgehog signaling.</i>                                             | 2.64E-05         |
| XENOBIOTIC METABOLISM             | <i>Genes encoding proteins involved in processing of drugs and other xenobiotics.</i>                      | 3.28E-05         |
| COAGULATION                       | <i>Genes encoding components of blood coagulation system; also up-regulated in platelets.</i>              | 7.17E-05         |
| CHOLESTEROL HOMEOSTASIS           | <i>Genes involved in cholesterol homeostasis.</i>                                                          | 9.22E-05         |
| PI3K-AKT MTOR SIGNALING           | <i>Genes up-regulated by activation of the PI3K/AKT/mTOR pathway.</i>                                      | 0.000621         |
| ESTROGEN RESPONSE EARLY           | <i>Genes defining early response to estrogen.</i>                                                          | 0.00088          |
| FATTY ACID METABOLISM             | <i>Genes encoding proteins involved in metabolism of fatty acids.</i>                                      | 0.00101          |
| REACTIVE OXYGEN SPECIES PATHWAY   | <i>Genes up-regulated by reactive oxygen species (ROS).</i>                                                | 0.00138          |
| ANDROGEN RESPONSE                 | <i>Genes defining response to androgens.</i>                                                               | 0.00329          |
| KRAS SIGNALING DN                 | <i>Genes down-regulated by KRAS activation.</i>                                                            | 0.00384          |
| MTORC1 SIGNALING                  | <i>Genes up-regulated through activation of mTORC1 complex.</i>                                            | 0.00384          |
| UV RESPONSE UP                    | <i>Genes up-regulated in response to ultraviolet (UV) radiation.</i>                                       | 0.00491          |
| INTERFERON ALPHA RESPONSE         | <i>Genes up-regulated in response to alpha interferon proteins.</i>                                        | 0.0156           |
| BILE ACID METABOLISM              | <i>Genes involve in metabolism of bile acids and salts.</i>                                                | 0.025            |



**Table S4. Genomic Properties Table.** 38 genomic properties are described in this table, including the method (metric of analysis), source and references for the analysis.

| Genomic Property           | Method                                                                                                                                                          | Source                                         | Reference                                              |
|----------------------------|-----------------------------------------------------------------------------------------------------------------------------------------------------------------|------------------------------------------------|--------------------------------------------------------|
| Centromere                 | log2 Distance of Breakpoints to Centromeres                                                                                                                     | UCSC GB hg19 gap track                         | doi:10.1093/nar/gkt1168                                |
| Telomere                   | log2 Distance of Breakpoints to Tentromeres                                                                                                                     | UCSC GB hg19 gap track                         | doi:10.1093/nar/gkt1168                                |
| GC content                 | 100 bp bins across the genome                                                                                                                                   | Hg19 FASTA                                     | NA                                                     |
| Sequence complexity        | Assigns complexity score to a sequence (high score = low complexity, low score = high complexity)                                                               | Hg19 FASTA                                     | NA                                                     |
| H3K9me3                    | p-value signal tracks from ChromImpute. Raw data in 25bp bins.                                                                                                  | ROADMAP (1,2)                                  | doi:10.1038/nature14248                                |
| H3K36me3                   | p-value signal tracks from ChromImpute. Raw data in 25bp bins.                                                                                                  | ROADMAP (1,2)                                  | doi:10.1038/nature14248                                |
| H4K20me1                   | p-value signal tracks from ChromImpute. Raw data in 25bp bins.                                                                                                  | ROADMAP (1,2)                                  | doi:10.1038/nature14248                                |
| H3K79me2                   | p-value signal tracks from ChromImpute. Raw data in 25bp bins.                                                                                                  | ROADMAP (1,2)                                  | doi:10.1038/nature14248                                |
| H3K4me1                    | p-value signal tracks from ChromImpute. Raw data in 25bp bins.                                                                                                  | ROADMAP (1,2)                                  | doi:10.1038/nature14248                                |
| H3K27ac                    | p-value signal tracks from ChromImpute. Raw data in 25bp bins.                                                                                                  | ROADMAP (1,2)                                  | doi:10.1038/nature14248                                |
| DNase                      | p-value signal tracks from ChromImpute. Raw data in 25bp bins.                                                                                                  | ROADMAP (1,2)                                  | doi:10.1038/nature14248                                |
| H3K9ac                     | p-value signal tracks from ChromImpute. Raw data in 25bp bins.                                                                                                  | ROADMAP (1,2)                                  | doi:10.1038/nature14248                                |
| H3K4me3                    | p-value signal tracks from ChromImpute. Raw data in 25bp bins.                                                                                                  | ROADMAP (1,2)                                  | doi:10.1038/nature14248                                |
| H3K4me2                    | p-value signal tracks from ChromImpute. Raw data in 25bp bins.                                                                                                  | ROADMAP (1,2)                                  | doi:10.1038/nature14248                                |
| H2A.Z                      | p-value signal tracks from ChromImpute. Raw data in 25bp bins.                                                                                                  | ROADMAP (1,2)                                  | doi:10.1038/nature14248                                |
| H3K27me3                   | p-value signal tracks from ChromImpute. Raw data in 25bp bins.                                                                                                  | ROADMAP (1,2)                                  | doi:10.1038/nature14248                                |
| RNA expression             | Imputed logRPKM track from RNA-seq data from ChromImpute. Raw data in 25bp bins.                                                                                | ROADMAP (1,2)                                  | doi:10.1038/nature14248                                |
| DNA methylation            | Imputed fractional methylation track from DNAMethylSBS data from ChromImpute. Raw data is fraction methylated at particular positions                           | ROADMAP (1,2)                                  | doi:10.1038/nature14248                                |
| Replication time           | Average wavelet smoothed signal (WSS) from from 3 cell lines: NHEK (normal skin, ectoderm), GM12878 (normal blood, mesoderm), and MR90 (normal lung, endoderm). | Repli-Seq data available via UCSC              | doi:10.1073/pnas.0912402107                            |
| Gene Density               | log2(distance to),density in sliding window (3)                                                                                                                 | GENCODE v19                                    | doi:10.1101/gr.135350.111                              |
| Lamina associated domains  | log2(distance to),density in sliding window (3)                                                                                                                 | Tig3ET normal human embryonic lung fibroblasts | doi:10.1038/nature06947                                |
| CpG islands                | log2(distance to),density in sliding window (3)                                                                                                                 | UCSC GB cpgislands track                       | doi:10.1093/nar/gkt1168                                |
| Direct repeats             | log2(distance to),density in sliding window (3)                                                                                                                 | non-B DB v2                                    | doi:10.1093/nar/gks955                                 |
| G-quadruplex               | log2(distance to),density in sliding window (3)                                                                                                                 | non-B DB v2                                    | doi:10.1093/nar/gks955                                 |
| Cruciform inverted repeats | log2(distance to),density in sliding window (3)                                                                                                                 | non-B DB v2                                    | doi:10.1093/nar/gks955                                 |
| Triplex mirror repeats     | log2(distance to),density in sliding window (3)                                                                                                                 | non-B DB v2                                    | doi:10.1093/nar/gks955                                 |
| Short tandem repeats       | log2(distance to),density in sliding window (3)                                                                                                                 | non-B DB v2                                    | doi:10.1093/nar/gks955                                 |
| Z-DNA motifs               | log2(distance to),density in sliding window (3)                                                                                                                 | non-B DB v2                                    | doi:10.1093/nar/gks955                                 |
| ALU repeats                | log2(distance to),density in sliding window (3)                                                                                                                 | Repeatmasker 20140131                          | http://www.repeatmasker.org                            |
| MIR repeats                | log2(distance to),density in sliding window (3)                                                                                                                 | Repeatmasker 20140131                          | http://www.repeatmasker.org                            |
| L1 repeats                 | log2(distance to),density in sliding window (3)                                                                                                                 | Repeatmasker 20140131                          | http://www.repeatmasker.org                            |
| L2 repeats                 | log2(distance to),density in sliding window (3)                                                                                                                 | Repeatmasker 20140131                          | http://www.repeatmasker.org                            |
| LTR repeats                | log2(distance to),density in sliding window (3)                                                                                                                 | Repeatmasker 20140131                          | http://www.repeatmasker.org                            |
| DNA repeats                | log2(distance to),density in sliding window (3)                                                                                                                 | Repeatmasker 20140131                          | http://www.repeatmasker.org                            |
| Simple repeats             | log2(distance to),density in sliding window (3)                                                                                                                 | Repeatmasker 20140131                          | http://www.repeatmasker.org                            |
| G4L1                       | log2(distance to),density in sliding window (3)                                                                                                                 | non-B DB v2                                    | doi:10.1093/nar/gks955                                 |
| Nucleosome occupancy       | Nucleosome density signal from K562 and GM12878 cell lines                                                                                                      | ENCODE, MNase experiment                       | https://www.encodeproject.org/experiments/ENCSR000CXQ/ |
| Recombination Rate         | Value at nearest point                                                                                                                                          | HAPMAP Phase II                                | doi:10.1038/nature06258                                |

Notes:

1. ROADMAP tracks used for Ewing's sarcoma: E025, E107, E108, E129 (average 1kb bins)
2. ROADMAP tracks used for Prostate Cancer: E028, E065, E076, E079, E094, E096, E098, E109, E126, E127 (average 1 kb bins)
3. Sizes of sliding windows analyzed (centered around 1kb bin): 1kb, 10kb, 100kb, 1MB

**Table S5. Clinical Information.** Detailed clinical information for the ES Toronto cohort is described in this table.

| Sample | Age at Diagnosis    | Sex | Age at Death        | Primary Site (+ Mets at Dx)                                                                        | Relapse                                         | Platform      |
|--------|---------------------|-----|---------------------|----------------------------------------------------------------------------------------------------|-------------------------------------------------|---------------|
| 2849   | 14 yrs, 1 mth       | F   |                     | left proximal humerus                                                                              | NO                                              | WXS           |
| 2226   | 16 yrs              | M   |                     | ethmoid sinus                                                                                      | NO                                              | WXS, WGS, WTS |
| 2234   | 14 yrs, 3 mths      | F   |                     | left distal femur                                                                                  | NO                                              | WXS, WGS, WTS |
| 2283   | 11 yrs, 10 mths     | M   |                     | left scapula                                                                                       | NO                                              | WXS           |
| 2498   | 8 yrs, 4 mths       | F   |                     | Unknown                                                                                            | NO                                              | WXS           |
| 3080   | 15 yrs, 9 mths      | M   | 17 yrs, 10 mths     | left superior pubic ramus                                                                          | YES                                             | WXS, WTS      |
| 3553   | 12 yrs, 6 mths      | M   |                     | right iliac (+ right lung)                                                                         | NO                                              | WXS           |
| 3943   | 10 yrs, 7 mths      | F   |                     | right distal tibia                                                                                 | NO                                              | WXS           |
| 2213   | 10 yrs              | M   | 13 yrs, 8 mths      | right distal femur (+ left femur, bilateral lung mets)                                             | YES                                             | WXS, WGS, WTS |
| 2440   | 8 yrs, 4 mths       | M   |                     | right ischium (+ bilateral tibia)                                                                  | NO                                              | WXS, WGS, WTS |
| 2244   | 9 yrs, 10 mths      | M   |                     | apex of right thorax                                                                               | NO                                              | WXS           |
| 2253   | 17 yrs, 3 mths      | M   | 19 yrs, 9 mths      | right distal fibula (+ multiple bone, BM)                                                          | YES                                             | WXS           |
| 2289   | 15 yrs, 8 mths      | F   |                     | 3rd left rib                                                                                       | YES                                             | WXS           |
| 2301   | 12 yrs, 8 mths      | F   | 13 yrs, 4 mths      | left 6th rib (+ BM, multiple bone, lung)                                                           | N/A - died while on therapy                     | WXS           |
| 2560   | 4 yrs, 3 mths       | M   |                     | right 3rd & 4th ribs                                                                               | NO                                              | WXS           |
| 3336   | 9 yrs, 7 mths       | M   |                     | left proximal fibula                                                                               | NO                                              | WXS, WTS      |
| 3480   | 7 yrs, 3 mths       | M   |                     | right proximal humerus                                                                             | NO                                              | WXS           |
| 3938   | 12 yrs, 9 mths      | M   |                     | right mid humerus                                                                                  | NO                                              | WXS           |
| 2331   | 13 yrs, 9 mths      | M   | 15 yrs, 3 mths      | left tibia (+ bilateral lung)                                                                      | YES                                             | WXS, WTS      |
| 2561   | 13 yrs, 2 mths      | M   | 16 yrs, 2 mths      | right buttock/lateral iliac crest (+ bilateral lung)                                               | YES                                             | WXS           |
| 2134   | 14 yrs, 11 mths     | F   |                     | left distal femur                                                                                  | NO - Developed AML secondary to treatment       | WXS, WTS      |
| 2187   | 13 yrs, 4 mths      | F   |                     | right maxillary sinus                                                                              | YES                                             | WXS           |
| 2925   | 16 yrs, 7 mths      | F   |                     | right proximal fibula                                                                              | NO                                              | WXS, WGS, WTS |
| 3935   | 15 yrs, 4 mths      | M   | 16 yrs, 8 mths      | left calcaneus (+ lung, multiple bone)                                                             | YES                                             | WXS           |
| 3071   | 16 yrs, 6 mths      | M   | Deceased-no date    | pelvis (+ lung)                                                                                    | N/A - DOD                                       | WXS, WGS, WTS |
| 3073   | 15 yrs, 11 mths     | F   |                     | scapula                                                                                            | NO                                              | WXS           |
| 3075   | 16 yrs, 6 mths      | F   | 18 yrs, 4 mths      | pelvis (+ BM)                                                                                      | N/A - DOD                                       | WXS, WTS      |
| 3077   | 17 yrs, 5 mths      | M   |                     | tibia                                                                                              | NO                                              | WXS, WTS      |
| 3131   | 19 yrs, 4 mths      | F   |                     | quadriceps                                                                                         | NO                                              | WXS, WTS      |
| 1514   | 2 yrs, 8 mths       | F   | 3 yrs, 2 mths       | skull (invading dura and left frontal lobe)                                                        | N/A - progressed; DOD                           | WXS           |
| 4021   | 9 yrs, 7 mths       | M   |                     | nasopharynx                                                                                        | NO                                              | WGS, WTS      |
| 4311   | 10 yrs, 6 mths      | M   |                     | right iliac/sacroiliac joint (+right femur, left humerus, right radius, skull, L2, T6, right lung) | YES                                             | WGS, WTS      |
| 4094   | 10 yrs, 2 mths      | F   |                     | left 7th rib                                                                                       | YES                                             | WGS           |
| 4004   | 13 yr, 7 mths       | M   |                     | posterior left 4th rib                                                                             | NO                                              | WGS           |
| 4022   | 16 yrs, 11 mths     | M   |                     | left hemi pelvis (multiple bone + BM)                                                              | N/A - refractory disease                        | WGS, WTS      |
| 4117   | 13 yrs, 3 mths      | M   |                     | pelvis (+bilateral lung)                                                                           | NO                                              | WGS           |
| 4120   | 4 yrs, 8 mths       | F   |                     | right proximal ulna                                                                                | NO                                              | WGS           |
| 4197   | 16 yrs, 2 mths      | F   |                     | anterior left 4th rib                                                                              | NO                                              | WGS           |
| 4226   | 12 yrs, 4 mths      | F   |                     | left medial thigh                                                                                  | NO                                              | WGS           |
| 4434   | 14 yrs, 10 mths     | M   |                     | Unknown                                                                                            | NO                                              | WGS, WTS      |
| 4436   | 15 yrs, 8 mths      | F   |                     | Unknown                                                                                            | NO                                              | WTS           |
| 4438   | 2 yrs, 10 mths      | M   | 3 yrs, 6 mths       | Unknown                                                                                            | NO                                              | WTS           |
| 4458   | 36 years, 7 months  | M   | 38 years, 5 months  | proximal tibia                                                                                     | YES (Lung)                                      | WGS, WTS      |
| 4459   | 17 years, 1 month   | M   |                     | proximal humerus                                                                                   | NO                                              | WGS, WTS      |
| 4460   | 24 years            | F   |                     | proximal femur                                                                                     | NO                                              | WGS, WTS      |
| 4461   | 21 years, 4 months  | M   |                     | scapula                                                                                            | NO                                              | WGS, WTS      |
| 4462   | 25 years, 7 months  | F   |                     | ilium                                                                                              | YES (bone- skull; lung; brain)                  | WGS, WTS      |
| 4463   | 28 years, 10 months | M   | 30 years, 10 months | distal femur (primary M1)                                                                          | NO                                              | WGS           |
| 4464   | 17 years, 8 months  | M   |                     | acetabulum                                                                                         | NO                                              | WGS, WTS      |
| 4465   | 21 years, 6 months  | F   | 22 years, 8 months  | proximal femur                                                                                     | YES (bone - spine; pelvis; contralateral femur) | WGS, WTS      |
| 4466   | 21 years, 8 months  | F   | 23 years, 4 months  | ilium                                                                                              | YES (Lung)                                      | WGS, WTS      |

## References and Notes

1. P. J. Stephens, C. D. Greenman, B. Fu, F. Yang, G. R. Bignell, L. J. Mudie, E. D. Pleasance, K. W. Lau, D. Beare, L. A. Stebbings, S. McLaren, M.-L. Lin, D. J. McBride, I. Varela, S. Nik-Zainal, C. Leroy, M. Jia, A. Menzies, A. P. Butler, J. W. Teague, M. A. Quail, J. Burton, H. Swerdlow, N. P. Carter, L. A. Morsberger, C. Iacobuzio-Donahue, G. A. Follows, A. R. Green, A. M. Flanagan, M. R. Stratton, P. A. Futreal, P. J. Campbell, Massive genomic rearrangement acquired in a single catastrophic event during cancer development. *Cell* **144**, 27–40 (2011). [doi:10.1016/j.cell.2010.11.055](https://doi.org/10.1016/j.cell.2010.11.055) [Medline](#)
2. S. C. Baca, D. Prandi, M. S. Lawrence, J. M. Mosquera, A. Romanel, Y. Drier, K. Park, N. Kitabayashi, T. Y. MacDonald, M. Ghandi, E. Van Allen, G. V. Kryukov, A. Sboner, J.-P. Theurillat, T. D. Soong, E. Nickerson, D. Auclair, A. Tewari, H. Beltran, R. C. Onofrio, G. Boysen, C. Guiducci, C. E. Barbieri, K. Cibulskis, A. Sivachenko, S. L. Carter, G. Saksena, D. Voet, A. H. Ramos, W. Winckler, M. Cipicchio, K. Ardlie, P. W. Kantoff, M. F. Berger, S. B. Gabriel, T. R. Golub, M. Meyerson, E. S. Lander, O. Elemento, G. Getz, F. Demichelis, M. A. Rubin, L. A. Garraway, Punctuated evolution of prostate cancer genomes. *Cell* **153**, 666–677 (2013). [doi:10.1016/j.cell.2013.03.021](https://doi.org/10.1016/j.cell.2013.03.021) [Medline](#)
3. F. Mitelman, B. Johansson, F. Mertens, The impact of translocations and gene fusions on cancer causation. *Nat. Rev. Cancer* **7**, 233–245 (2007). [doi:10.1038/nrc2091](https://doi.org/10.1038/nrc2091) [Medline](#)
4. E. Papaemmanuil, I. Rapado, Y. Li, N. E. Potter, D. C. Wedge, J. Tubio, L. B. Alexandrov, P. Van Loo, S. L. Cooke, J. Marshall, I. Martincorena, J. Hinton, G. Gundem, F. W. van Delft, S. Nik-Zainal, D. R. Jones, M. Ramakrishna, I. Tittley, L. Stebbings, C. Leroy, A. Menzies, J. Gamble, B. Robinson, L. Mudie, K. Raine, S. O’Meara, J. W. Teague, A. P. Butler, G. Cazzaniga, A. Biondi, J. Zuna, H. Kempinski, M. Muschen, A. M. Ford, M. R. Stratton, M. Greaves, P. J. Campbell, RAG-mediated recombination is the predominant driver of oncogenic rearrangement in *ETV6-RUNX1* acute lymphoblastic leukemia. *Nat. Genet.* **46**, 116–125 (2014). [doi:10.1038/ng.2874](https://doi.org/10.1038/ng.2874) [Medline](#)
5. S. Sankar, S. L. Lessnick, Promiscuous partnerships in Ewing’s sarcoma. *Cancer Genet.* **204**, 351–365 (2011). [doi:10.1016/j.cancergen.2011.07.008](https://doi.org/10.1016/j.cancergen.2011.07.008) [Medline](#)
6. H. Kovar, Blocking the road, stopping the engine or killing the driver? Advances in targeting EWS/FLI-1 fusion in Ewing sarcoma as novel therapy. *Expert Opin. Ther. Targets* **18**, 1315–1328 (2014). [doi:10.1517/14728222.2014.947963](https://doi.org/10.1517/14728222.2014.947963) [Medline](#)
7. A. S. Brohl, D. A. Solomon, W. Chang, J. Wang, Y. Song, S. Sindiri, R. Patidar, L. Hurd, L. Chen, J. F. Shern, H. Liao, X. Wen, J. Gerard, J.-S. Kim, J. A. Lopez Guerrero, I. Machado, D. H. Wai, P. Picci, T. Triche, A. E. Horvai, M. Miettinen, J. S. Wei, D. Catchpool, A. Llombart-Bosch, T. Waldman, J. Khan, The genomic landscape of the Ewing sarcoma family of tumors reveals recurrent *STAG2* mutation. *PLOS Genet.* **10**, e1004475 (2014). [doi:10.1371/journal.pgen.1004475](https://doi.org/10.1371/journal.pgen.1004475) [Medline](#)
8. B. D. Crompton, C. Stewart, A. Taylor-Weiner, G. Alexe, K. C. Kurek, M. L. Calicchio, A. Kiezun, S. L. Carter, S. A. Shukla, S. S. Mehta, A. R. Thorner, C. de Torres, C. Lavarino, M. Suñol, A. McKenna, A. Sivachenko, K. Cibulskis, M. S. Lawrence, P. Stojanov, M. Rosenberg, L. Ambrogio, D. Auclair, S. Seepo, B. Blumenstiel, M. DeFelice, I. Imaz-Rosshandler, A. Schwarz-Cruz Y Celis, M. N. Rivera, C. Rodriguez-Galindo, M. D.

- Fleming, T. R. Golub, G. Getz, J. Mora, K. Stegmaier, The genomic landscape of pediatric Ewing sarcoma. *Cancer Discov.* **4**, 1326–1341 (2014). [doi:10.1158/2159-8290.CD-13-1037](https://doi.org/10.1158/2159-8290.CD-13-1037) [Medline](#)
9. M. S. Lawrence, P. Stojanov, P. Polak, G. V. Kryukov, K. Cibulskis, A. Sivachenko, S. L. Carter, C. Stewart, C. H. Mermel, S. A. Roberts, A. Kiezun, P. S. Hammerman, A. McKenna, Y. Drier, L. Zou, A. H. Ramos, T. J. Pugh, N. Stransky, E. Helman, J. Kim, C. Sougnez, L. Ambrogio, E. Nickerson, E. Shefler, M. L. Cortés, D. Auclair, G. Saksena, D. Voet, M. Noble, D. DiCara, P. Lin, L. Lichtenstein, D. I. Heiman, T. Fennell, M. Imielinski, B. Hernandez, E. Hodis, S. Baca, A. M. Dulak, J. Lohr, D.-A. Landau, C. J. Wu, J. Melendez-Zajgla, A. Hidalgo-Miranda, A. Koren, S. A. McCarroll, J. Mora, B. Crompton, R. Onofrio, M. Parkin, W. Winckler, K. Ardlie, S. B. Gabriel, C. W. M. Roberts, J. A. Biegel, K. Stegmaier, A. J. Bass, L. A. Garraway, M. Meyerson, T. R. Golub, D. A. Gordenin, S. Sunyaev, E. S. Lander, G. Getz, Mutational heterogeneity in cancer and the search for new cancer-associated genes. *Nature* **499**, 214–218 (2013). [doi:10.1038/nature12213](https://doi.org/10.1038/nature12213) [Medline](#)
10. F. Tirode, D. Surdez, X. Ma, M. Parker, M. C. Le Deley, A. Bahrami, Z. Zhang, E. Lapouble, S. Grossetête-Lalami, M. Rusch, S. Reynaud, T. Rio-Frio, E. Hedlund, G. Wu, X. Chen, G. Pierron, O. Oberlin, S. Zaidi, G. Lemmon, P. Gupta, B. Vadodaria, J. Easton, M. Gut, L. Ding, E. R. Mardis, R. K. Wilson, S. Shurtleff, V. Laurence, J. Michon, P. Marec-Bérard, I. Gut, J. Downing, M. Dyer, J. Zhang, O. Delattre; St. Jude Children’s Research Hospital–Washington University Pediatric Cancer Genome Project and the International Cancer Genome Consortium, Genomic landscape of Ewing sarcoma defines an aggressive subtype with co-association of *STAG2* and *TP53* mutations. *Cancer Discov.* **4**, 1342–1353 (2014). [doi:10.1158/2159-8290.CD-14-0622](https://doi.org/10.1158/2159-8290.CD-14-0622) [Medline](#)
11. L. B. Alexandrov, S. Nik-Zainal, D. C. Wedge, S. A. J. R. Aparicio, S. Behjati, A. V. Biankin, G. R. Bignell, N. Bolli, A. Borg, A.-L. Børresen-Dale, S. Boyault, B. Burkhardt, A. P. Butler, C. Caldas, H. R. Davies, C. Desmedt, R. Eils, J. E. Eyfjörd, J. A. Foekens, M. Greaves, F. Hosoda, B. Hutter, T. Ilcic, S. Imbeaud, M. Imielinski, N. Jäger, D. T. W. Jones, D. Jones, S. Knappskog, M. Kool, S. R. Lakhani, C. López-Otín, S. Martin, N. C. Munshi, H. Nakamura, P. A. Northcott, M. Pajic, E. Papaemmanuil, A. Paradiso, J. V. Pearson, X. S. Puente, K. Raine, M. Ramakrishna, A. L. Richardson, J. Richter, P. Rosenstiel, M. Schlesner, T. N. Schumacher, P. N. Span, J. W. Teague, Y. Totoki, A. N. J. Tutt, R. Valdés-Mas, M. M. van Buuren, L. van ’t Veer, A. Vincent-Salomon, N. Waddell, L. R. Yates, J. Zucman-Rossi, P. A. Futreal, U. McDermott, P. Lichter, M. Meyerson, S. M. Grimmond, R. Siebert, E. Campo, T. Shibata, S. M. Pfister, P. J. Campbell, M. R. Stratton; Australian Pancreatic Cancer Genome Initiative; ICGC Breast Cancer Consortium; ICGC MMML-Seq Consortium; ICGC PedBrain, Signatures of mutational processes in human cancer. *Nature* **500**, 415–421 (2013). [doi:10.1038/nature12477](https://doi.org/10.1038/nature12477) [Medline](#)
12. L. B. Alexandrov, S. Nik-Zainal, D. C. Wedge, P. J. Campbell, M. R. Stratton, Deciphering signatures of mutational processes operative in human cancer. *Cell Reports* **3**, 246–259 (2013). [doi:10.1016/j.celrep.2012.12.008](https://doi.org/10.1016/j.celrep.2012.12.008) [Medline](#)

13. L. B. Alexandrov, P. H. Jones, D. C. Wedge, J. E. Sale, P. J. Campbell, S. Nik-Zainal, M. R. Stratton, Clock-like mutational processes in human somatic cells. *Nat. Genet.* **47**, 1402–1407 (2015). [doi:10.1038/ng.3441](https://doi.org/10.1038/ng.3441) [Medline](#)
14. A. Zoubek, C. Pfliederer, M. Salzer-Kuntschik, G. Amann, R. Windhager, F. M. Fink, E. Koscielniak, O. Delattre, S. Strehl, P. F. Ambros, H. Gadner, H. Kovar, Variability of EWS chimaeric transcripts in Ewing tumours: A comparison of clinical and molecular data. *Br. J. Cancer* **70**, 908–913 (1994). [doi:10.1038/bjc.1994.419](https://doi.org/10.1038/bjc.1994.419) [Medline](#)
15. C. M. Hattinger, U. Pötschger, M. Tarkkanen, J. Squire, M. Zielenska, S. Kiuru-Kuhlefelt, L. Kager, P. Thorner, S. Knuutila, F. K. Niggli, P. F. Ambros, H. Gadner, D. R. Betts, Prognostic impact of chromosomal aberrations in Ewing tumours. *Br. J. Cancer* **86**, 1763–1769 (2002). [doi:10.1038/sj.bjc.6600332](https://doi.org/10.1038/sj.bjc.6600332) [Medline](#)
16. P. M. Neilsen, K. I. Pishas, D. F. Callen, D. M. Thomas, Targeting the p53 pathway in Ewing sarcoma. *Sarcoma* **2011**, 746939 (2011). [doi:10.1155/2011/746939](https://doi.org/10.1155/2011/746939) [Medline](#)
17. C. S. Cooper, R. Eeles, D. C. Wedge, P. Van Loo, G. Gundem, L. B. Alexandrov, B. Kremeyer, A. Butler, A. G. Lynch, N. Camacho, C. E. Massie, J. Kay, H. J. Luxton, S. Edwards, Z. Kote-Jarai, N. Dennis, S. Merson, D. Leongamornlert, J. Zamora, C. Corbishley, S. Thomas, S. Nik-Zainal, M. Ramakrishna, S. O’Meara, L. Matthews, J. Clark, R. Hurst, R. Mithen, R. G. Bristow, P. C. Boutros, M. Fraser, S. Cooke, K. Raine, D. Jones, A. Menzies, L. Stebbings, J. Hinton, J. Teague, S. McLaren, L. Mudie, C. Hardy, E. Anderson, O. Joseph, V. Goody, B. Robinson, M. Maddison, S. Gamble, C. Greenman, D. Berney, S. Hazell, N. Livni, C. Fisher, C. Ogden, P. Kumar, A. Thompson, C. Woodhouse, D. Nicol, E. Mayer, T. Dudderidge, N. C. Shah, V. Gnanapragasam, T. Voet, P. Campbell, A. Futreal, D. Easton, A. Y. Warren, C. S. Foster, M. R. Stratton, H. C. Whitaker, U. McDermott, D. S. Brewer, D. E. Neal; ICGC Prostate Group, Analysis of the genetic phylogeny of multifocal prostate cancer identifies multiple independent clonal expansions in neoplastic and morphologically normal prostate tissue. *Nat. Genet.* **47**, 367–372 (2015). [doi:10.1038/ng.3221](https://doi.org/10.1038/ng.3221) [Medline](#)
18. A. Liberzon, C. Birger, H. Thorvaldsdóttir, M. Ghandi, J. P. Mesirov, P. Tamayo, The Molecular Signatures Database (MSigDB) hallmark gene set collection. *Cell Syst.* **1**, 417–425 (2015). [doi:10.1016/j.cels.2015.12.004](https://doi.org/10.1016/j.cels.2015.12.004) [Medline](#)
19. K. H. Nord, H. Lilljebjörn, F. Vezzi, J. Nilsson, L. Magnusson, J. Tayebwa, D. de Jong, J. V. M. G. Bovée, P. C. W. Hogendoorn, K. Szuhai, *GRM1* is upregulated through gene fusion and promoter swapping in chondromyxoid fibroma. *Nat. Genet.* **46**, 474–477 (2014). [doi:10.1038/ng.2927](https://doi.org/10.1038/ng.2927) [Medline](#)
20. A. Malhotra, M. Lindberg, G. G. Faust, M. L. Leibowitz, R. A. Clark, R. M. Layer, A. R. Quinlan, I. M. Hall, Breakpoint profiling of 64 cancer genomes reveals numerous complex rearrangements spawned by homology-independent mechanisms. *Genome Res.* **23**, 762–776 (2013). [doi:10.1101/gr.143677.112](https://doi.org/10.1101/gr.143677.112) [Medline](#)
21. J. O. Korbel, P. J. Campbell, Criteria for inference of chromothripsis in cancer genomes. *Cell* **152**, 1226–1236 (2013). [doi:10.1016/j.cell.2013.02.023](https://doi.org/10.1016/j.cell.2013.02.023) [Medline](#)
22. R. S. Hansen, S. Thomas, R. Sandstrom, T. K. Canfield, R. E. Thurman, M. Weaver, M. O. Dorschner, S. M. Gartler, J. A. Stamatoyannopoulos, Sequencing newly replicated DNA



- reveals widespread plasticity in human replication timing. *Proc. Natl. Acad. Sci. U.S.A.* **107**, 139–144 (2010). [doi:10.1073/pnas.0912402107](https://doi.org/10.1073/pnas.0912402107) [Medline](#)
23. J. Sima, D. M. Gilbert, Complex correlations: Replication timing and mutational landscapes during cancer and genome evolution. *Curr. Opin. Genet. Dev.* **25**, 93–100 (2014). [doi:10.1016/j.gde.2013.11.022](https://doi.org/10.1016/j.gde.2013.11.022) [Medline](#)
24. J. Merlevede, N. Droin, T. Qin, K. Meldi, K. Yoshida, M. Morabito, E. Chautard, D. Auboeuf, P. Fenaux, T. Braun, R. Itzykson, S. de Botton, B. Quesnel, T. Commes, E. Jourdan, W. Vainchenker, O. Bernard, N. Pata-Merci, S. Solier, V. Gayevskiy, M. E. Dinger, M. J. Cowley, D. Selimoglu-Buet, V. Meyer, F. Artiguenave, J.-F. Deleuze, C. Preudhomme, M. R. Stratton, L. B. Alexandrov, E. Padron, S. Ogawa, S. Koscielny, M. Figueroa, E. Solary, Mutation allele burden remains unchanged in chronic myelomonocytic leukaemia responding to hypomethylating agents. *Nat. Commun.* **7**, 10767 (2016). [doi:10.1038/ncomms10767](https://doi.org/10.1038/ncomms10767) [Medline](#)
25. J. W. Gray, Evidence emerges for early metastasis and parallel evolution of primary and metastatic tumors. *Cancer Cell* **4**, 4–6 (2003). [doi:10.1016/S1535-6108\(03\)00167-3](https://doi.org/10.1016/S1535-6108(03)00167-3) [Medline](#)
26. J. F. Brasme, M. Chalumeau, O. Oberlin, D. Valteau-Couanet, N. Gaspar, Time to diagnosis of Ewing tumors in children and adolescents is not associated with metastasis or survival: A prospective multicenter study of 436 patients. *J. Clin. Oncol.* **32**, 1935–1940 (2014). [doi:10.1200/JCO.2013.53.8058](https://doi.org/10.1200/JCO.2013.53.8058) [Medline](#)
27. P. Roberts, S. A. Burchill, S. Brownhill, C. J. Cullinane, C. Johnston, M. J. Griffiths, D. J. McMullan, N. P. Bown, S. P. Morris, I. J. Lewis, Ploidy and karyotype complexity are powerful prognostic indicators in the Ewing's sarcoma family of tumors: A study by the United Kingdom Cancer Cytogenetics and the Children's Cancer and Leukaemia Group. *Genes Chromosomes Cancer* **47**, 207–220 (2008). [doi:10.1002/gcc.20523](https://doi.org/10.1002/gcc.20523) [Medline](#)
28. K. Cibulskis, M. S. Lawrence, S. L. Carter, A. Sivachenko, D. Jaffe, C. Sougnez, S. Gabriel, M. Meyerson, E. S. Lander, G. Getz, Sensitive detection of somatic point mutations in impure and heterogeneous cancer samples. *Nat. Biotechnol.* **31**, 213–219 (2013). [doi:10.1038/nbt.2514](https://doi.org/10.1038/nbt.2514) [Medline](#)
29. T. Rausch, T. Zichner, A. Schlattl, A. M. Stütz, V. Benes, J. O. Korbel, DELLY: Structural variant discovery by integrated paired-end and split-read analysis. *Bioinformatics* **28**, i333–i339 (2012). [doi:10.1093/bioinformatics/bts378](https://doi.org/10.1093/bioinformatics/bts378) [Medline](#)
30. D. W. Craig, S. Nasser, R. Corbett, S. K. Chan, L. Murray, C. Legendre, W. Tembe, J. Adkins, N. Kim, S. Wong, A. Baker, D. Enriquez, S. Pond, E. Pleasance, A. J. Mungall, R. A. Moore, T. McDaniel, Y. Ma, S. J. M. Jones, M. A. Marra, J. D. Carpten, W. S. Liang, A somatic reference standard for cancer genome sequencing. *Sci. Rep.* **6**, 24607 (2016). [doi:10.1038/srep24607](https://doi.org/10.1038/srep24607) [Medline](#)
31. R. Xi, A. G. Hadjipanayis, L. J. Luquette, T.-M. Kim, E. Lee, J. Zhang, M. D. Johnson, D. M. Muzny, D. A. Wheeler, R. A. Gibbs, R. Kucherlapati, P. J. Park, Copy number variation detection in whole-genome sequencing data using the Bayesian information criterion. *Proc. Natl. Acad. Sci. U.S.A.* **108**, E1128–E1136 (2011). [doi:10.1073/pnas.1110574108](https://doi.org/10.1073/pnas.1110574108) [Medline](#)

32. A. Shlien, B. B. Campbell, R. de Borja, L. B. Alexandrov, D. Merico, D. Wedge, P. Van Loo, P. S. Tarpey, P. Coupland, S. Behjati, A. Pollett, T. Lipman, A. Heidari, S. Deshmukh, N. Avitzur, B. Meier, M. Gerstung, Y. Hong, D. M. Merino, M. Ramakrishna, M. Remke, R. Arnold, G. B. Panigrahi, N. P. Thakkar, K. P. Hodel, E. E. Henninger, A. Y. Göksenin, D. Bakry, G. S. Charames, H. Druker, J. Lerner-Ellis, M. Mistry, R. Dvir, R. Grant, R. Elhasid, R. Farah, G. P. Taylor, P. C. Nathan, S. Alexander, S. Ben-Shachar, S. C. Ling, S. Gallinger, S. Constantini, P. Dirks, A. Huang, S. W. Scherer, R. G. Grundy, C. Durno, M. Aronson, A. Gartner, M. S. Meyn, M. D. Taylor, Z. F. Pursell, C. E. Pearson, D. Malkin, P. A. Futreal, M. R. Stratton, E. Bouffet, C. Hawkins, P. J. Campbell, U. Tabori; Biallelic Mismatch Repair Deficiency Consortium, Combined hereditary and somatic mutations of replication error repair genes result in rapid onset of ultra-hypermutated cancers. *Nat. Genet.* **47**, 257–262 (2015). [doi:10.1038/ng.3202](https://doi.org/10.1038/ng.3202) [Medline](#)
33. H. Li, Toward better understanding of artifacts in variant calling from high-coverage samples. *Bioinformatics* **30**, 2843–2851 (2014). [doi:10.1093/bioinformatics/btu356](https://doi.org/10.1093/bioinformatics/btu356) [Medline](#)
34. A. Morgulis, E. M. Gertz, A. A. Schäffer, R. Agarwala, A fast and symmetric DUST implementation to mask low-complexity DNA sequences. *J. Comput. Biol.* **13**, 1028–1040 (2006). [doi:10.1089/cmb.2006.13.1028](https://doi.org/10.1089/cmb.2006.13.1028) [Medline](#)
35. P. Rice, I. Longden, A. Bleasby, EMBOSS: The European Molecular Biology Open Software Suite. *Trends Genet.* **16**, 276–277 (2000). [doi:10.1016/S0168-9525\(00\)02024-2](https://doi.org/10.1016/S0168-9525(00)02024-2) [Medline](#)
36. M. Zarrei, J. R. MacDonald, D. Merico, S. W. Scherer, A copy number variation map of the human genome. *Nat. Rev. Genet.* **16**, 172–183 (2015). [doi:10.1038/nrg3871](https://doi.org/10.1038/nrg3871) [Medline](#)
37. J. Cohen, The statistical power of abnormal-social psychological research: A review. *J. Abnorm. Soc. Psychol.* **65**, 145–153 (1962). [doi:10.1037/h0045186](https://doi.org/10.1037/h0045186) [Medline](#)
38. J. Cohen, A power primer. *Psychol. Bull.* **112**, 155–159 (1992). [doi:10.1037/0033-2909.112.1.155](https://doi.org/10.1037/0033-2909.112.1.155) [Medline](#)
39. S. Anders, P. T. Pyl, W. Huber, HTSeq—A Python framework to work with high-throughput sequencing data. *Bioinformatics* **31**, 166–169 (2015). [doi:10.1093/bioinformatics/btu638](https://doi.org/10.1093/bioinformatics/btu638) [Medline](#)
40. M. D. Robinson, D. J. McCarthy, G. K. Smyth, edgeR: A Bioconductor package for differential expression analysis of digital gene expression data. *Bioinformatics* **26**, 139–140 (2010). [doi:10.1093/bioinformatics/btp616](https://doi.org/10.1093/bioinformatics/btp616) [Medline](#)
41. D. J. McCarthy, Y. Chen, G. K. Smyth, Differential expression analysis of multifactor RNA-Seq experiments with respect to biological variation. *Nucleic Acids Res.* **40**, 4288–4297 (2012). [doi:10.1093/nar/gks042](https://doi.org/10.1093/nar/gks042) [Medline](#)
42. M. S. Jahromi, A. R. Putnam, C. Druzgal, J. Wright, H. Spraker-Perlman, M. Kinsey, H. Zhou, K. M. Boucher, R. L. Randall, K. B. Jones, D. Lucas, A. Rosenberg, D. Thomas, S. L. Lessnick, J. D. Schiffman, Molecular inversion probe analysis detects novel copy number alterations in Ewing sarcoma. *Cancer Genet.* **205**, 391–404 (2012). [doi:10.1016/j.cancergen.2012.05.012](https://doi.org/10.1016/j.cancergen.2012.05.012) [Medline](#)

43. C. Pilati, J. Shinde, L. B. Alexandrov, G. Assié, T. André, Z. Hélias-Rodzewicz, R. Ducoudray, D. Le Corre, J. Zucman-Rossi, J.-F. Emile, J. Bertherat, E. Letouzé, P. Laurent-Puig, Mutational signature analysis identifies *MUTYH* deficiency in colorectal cancers and adrenocortical carcinomas. *J. Pathol.* **242**, 10–15 (2017).  
[doi:10.1002/path.4880](https://doi.org/10.1002/path.4880) [Medline](#)
